# Supplementary material for: Trichoderols B-G, Six New Lipids from the Marine Algicolous Fungus Trichoderma sp. Z43
Source: MDPI journal article supplement (doi:10.3390/md21080453), 2023-08-17
Supplement: s1 [file s1]

## Supplementary Materials

### Trichoderols B-G, Six New Lipids from the Marine Algicolous Fungus

#### *Trichoderma* sp. Z43

Zhen-Zhen Shi<sup>1</sup>, Xiu-Li Yin<sup>1</sup>, Nai-Yun Ji<sup>1, 2\*</sup>

1 Yantai Institute of Coastal Zone Research, Chinese Academy of Sciences, Yantai 264003, China;

zzshi@yic.ac.cn (Z.-Z.S.); xlyin@yic.ac.cn (X.-L.Y.)

2 Shandong Saline-Alkaline Land Modern Agriculture Company, Dongying 257345, China

\* Correspondence: nyji@yic.ac.cn; Tel.: +86-535-210-9176

## Table of Contents

- Figure S1.**  $^1\text{H}$  NMR spectrum of compound **1** in  $\text{CDCl}_3$   
**Figure S2.**  $^{13}\text{C}$  NMR and DEPT spectra of compound **1** in  $\text{CDCl}_3$   
**Figure S3.** HSQC spectrum of compound **1** in  $\text{CDCl}_3$   
**Figure S4.** HMBC spectrum of compound **1** in  $\text{CDCl}_3$   
**Figure S5.** COSY spectrum of compound **1** in  $\text{CDCl}_3$   
**Figure S6.** NOESY spectrum of compound **1** in  $\text{CDCl}_3$   
**Figure S7.** HRESIMS spectrum of compound **1**  
**Figure S8.**  $^1\text{H}$  NMR spectrum of compound **2** in  $\text{CD}_3\text{OD}$   
**Figure S9.**  $^{13}\text{C}$  NMR and DEPT spectra of compound **2** in  $\text{CD}_3\text{OD}$   
**Figure S10.** HSQC spectrum of compound **2** in  $\text{CD}_3\text{OD}$   
**Figure S11.** HMBC spectrum of compound **2** in  $\text{CD}_3\text{OD}$   
**Figure S12.** COSY spectrum of compound **2** in  $\text{CD}_3\text{OD}$   
**Figure S13.** NOESY spectrum of compound **2** in  $\text{CD}_3\text{OD}$   
**Figure S14.** HRESIMS spectrum of compound **2**  
**Figure S15.**  $^1\text{H}$  NMR spectrum of compound **3** in  $\text{CDCl}_3$   
**Figure S16.**  $^{13}\text{C}$  NMR and DEPT spectra of compound **3** in  $\text{CDCl}_3$   
**Figure S17.** HSQC spectrum of compound **3** in  $\text{CDCl}_3$   
**Figure S18.** HMBC spectrum of compound **3** in  $\text{CDCl}_3$   
**Figure S19.** COSY spectrum of compound **3** in  $\text{CDCl}_3$   
**Figure S20.** NOESY spectrum of compound **3** in  $\text{CDCl}_3$   
**Figure S21.** HREIMS spectrum of compound **3**  
**Figure S22.**  $^1\text{H}$  NMR spectrum of compound **4** in  $\text{CD}_3\text{OD}$   
**Figure S23.**  $^{13}\text{C}$  NMR and DEPT spectra of compound **4** in  $\text{CD}_3\text{OD}$   
**Figure S24.** HSQC spectrum of compound **4** in  $\text{CD}_3\text{OD}$   
**Figure S25.** HMBC spectrum of compound **4** in  $\text{CD}_3\text{OD}$   
**Figure S26.** COSY spectrum of compound **4** in  $\text{CD}_3\text{OD}$   
**Figure S27.** NOESY spectrum of compound **4** in  $\text{CD}_3\text{OD}$   
**Figure S28.** HRESIMS spectrum of compound **4**  
**Figure S29.**  $^1\text{H}$  NMR spectrum of compound **5** in  $\text{CD}_3\text{OD}$   
**Figure S30.**  $^{13}\text{C}$  NMR and DEPT spectra of compound **5** in  $\text{CD}_3\text{OD}$   
**Figure S31.** HSQC spectrum of compound **5** in  $\text{CD}_3\text{OD}$   
**Figure S32.** HMBC spectrum of compound **5** in  $\text{CD}_3\text{OD}$   
**Figure S33.** COSY spectrum of compound **5** in  $\text{CD}_3\text{OD}$   
**Figure S34.** NOESY spectrum of compound **5** in  $\text{CD}_3\text{OD}$   
**Figure S35.** HRESIMS spectrum of compound **5**  
**Figure S36.**  $^1\text{H}$  NMR spectrum of compound **6** in  $\text{CD}_3\text{OD}$   
**Figure S37.**  $^{13}\text{C}$  NMR and DEPT spectra of compound **6** in  $\text{CD}_3\text{OD}$   
**Figure S38.** HSQC spectrum of compound **6** in  $\text{CD}_3\text{OD}$

**Figure S39.** HMBC spectrum of compound **6** in CD<sub>3</sub>OD

**Figure S40.** COSY spectrum of compound **6** in CD<sub>3</sub>OD

**Figure S41.** NOESY spectrum of compound **6** in CD<sub>3</sub>OD

**Figure S42.** HRESIMS spectrum of compound **6**

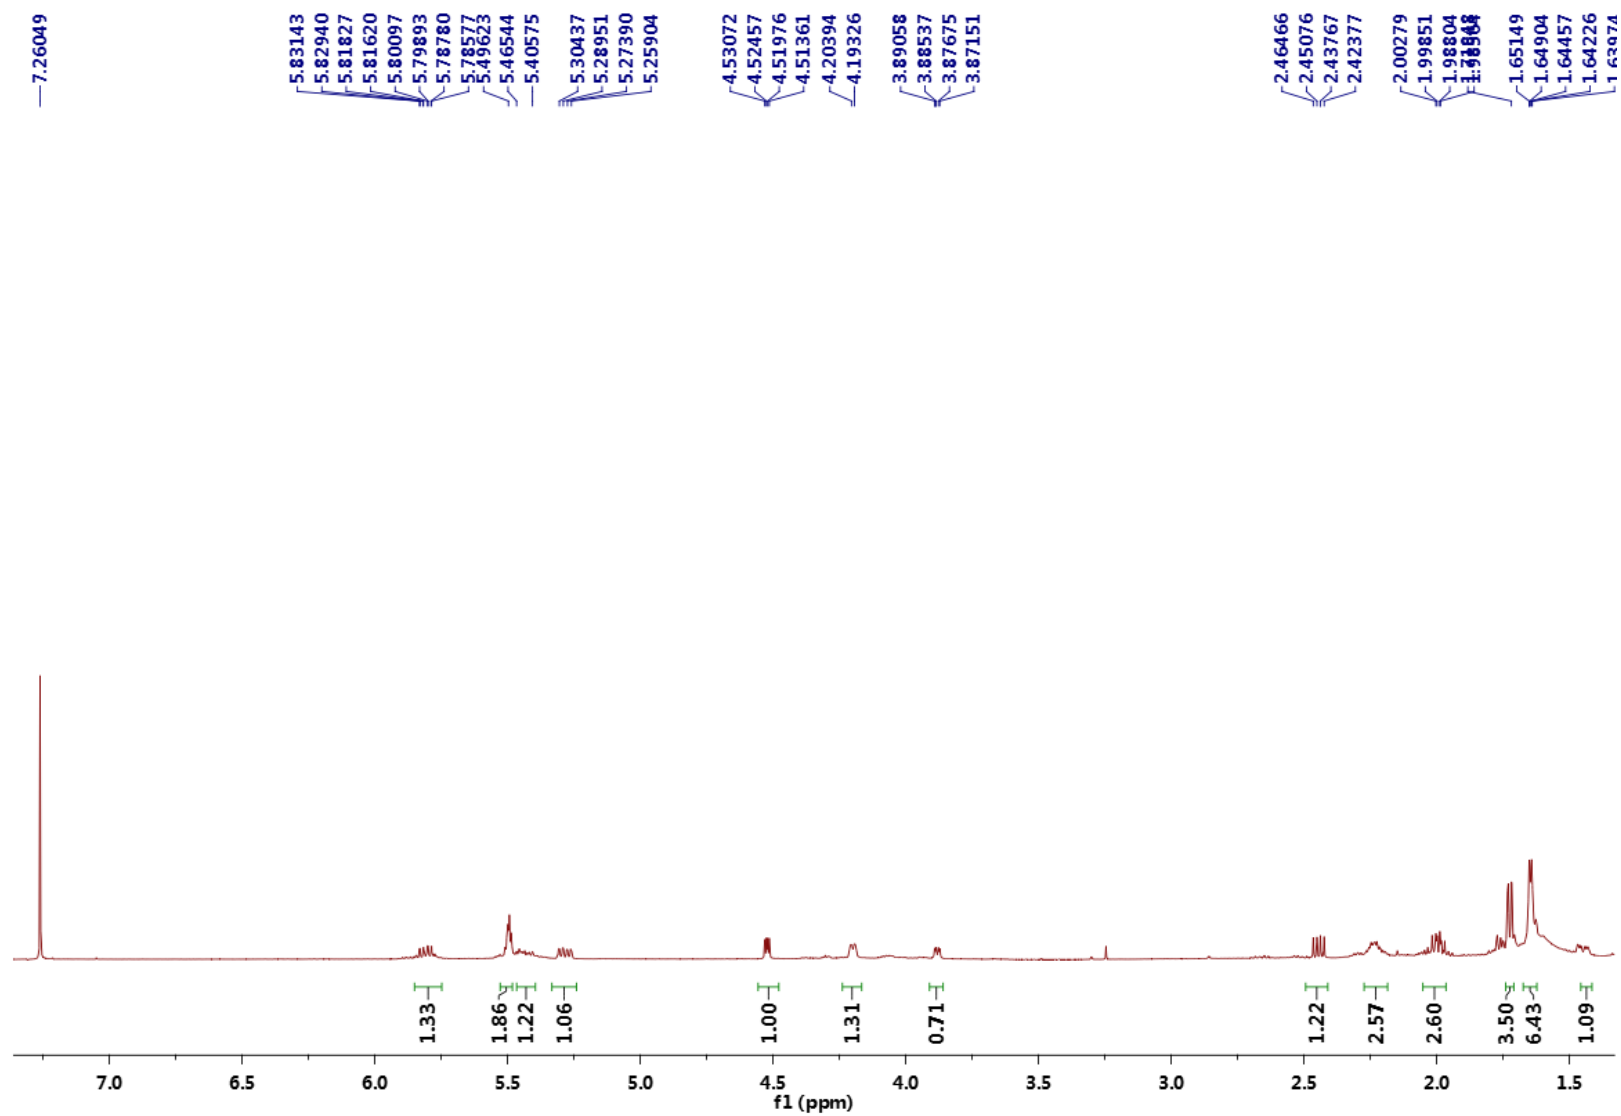

**Figure S1.**  $^1\text{H}$  NMR spectrum of compound **1** in  $\text{CDCl}_3$

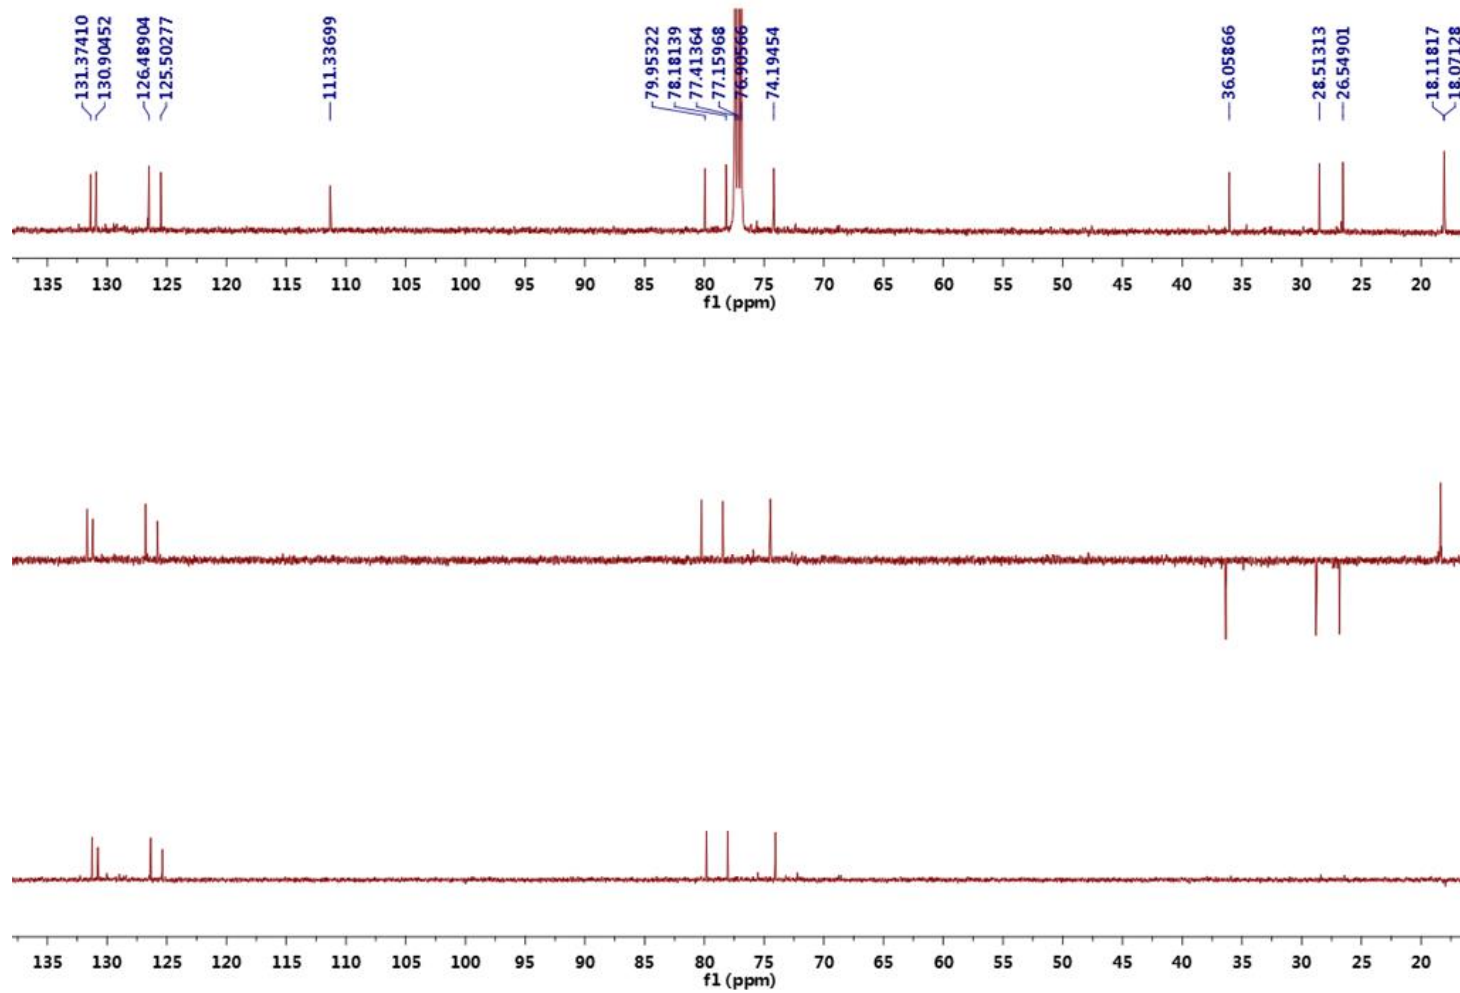

**Figure S2.**  $^{13}\text{C}$  NMR and DEPT spectra of compound **1** in  $\text{CDCl}_3$

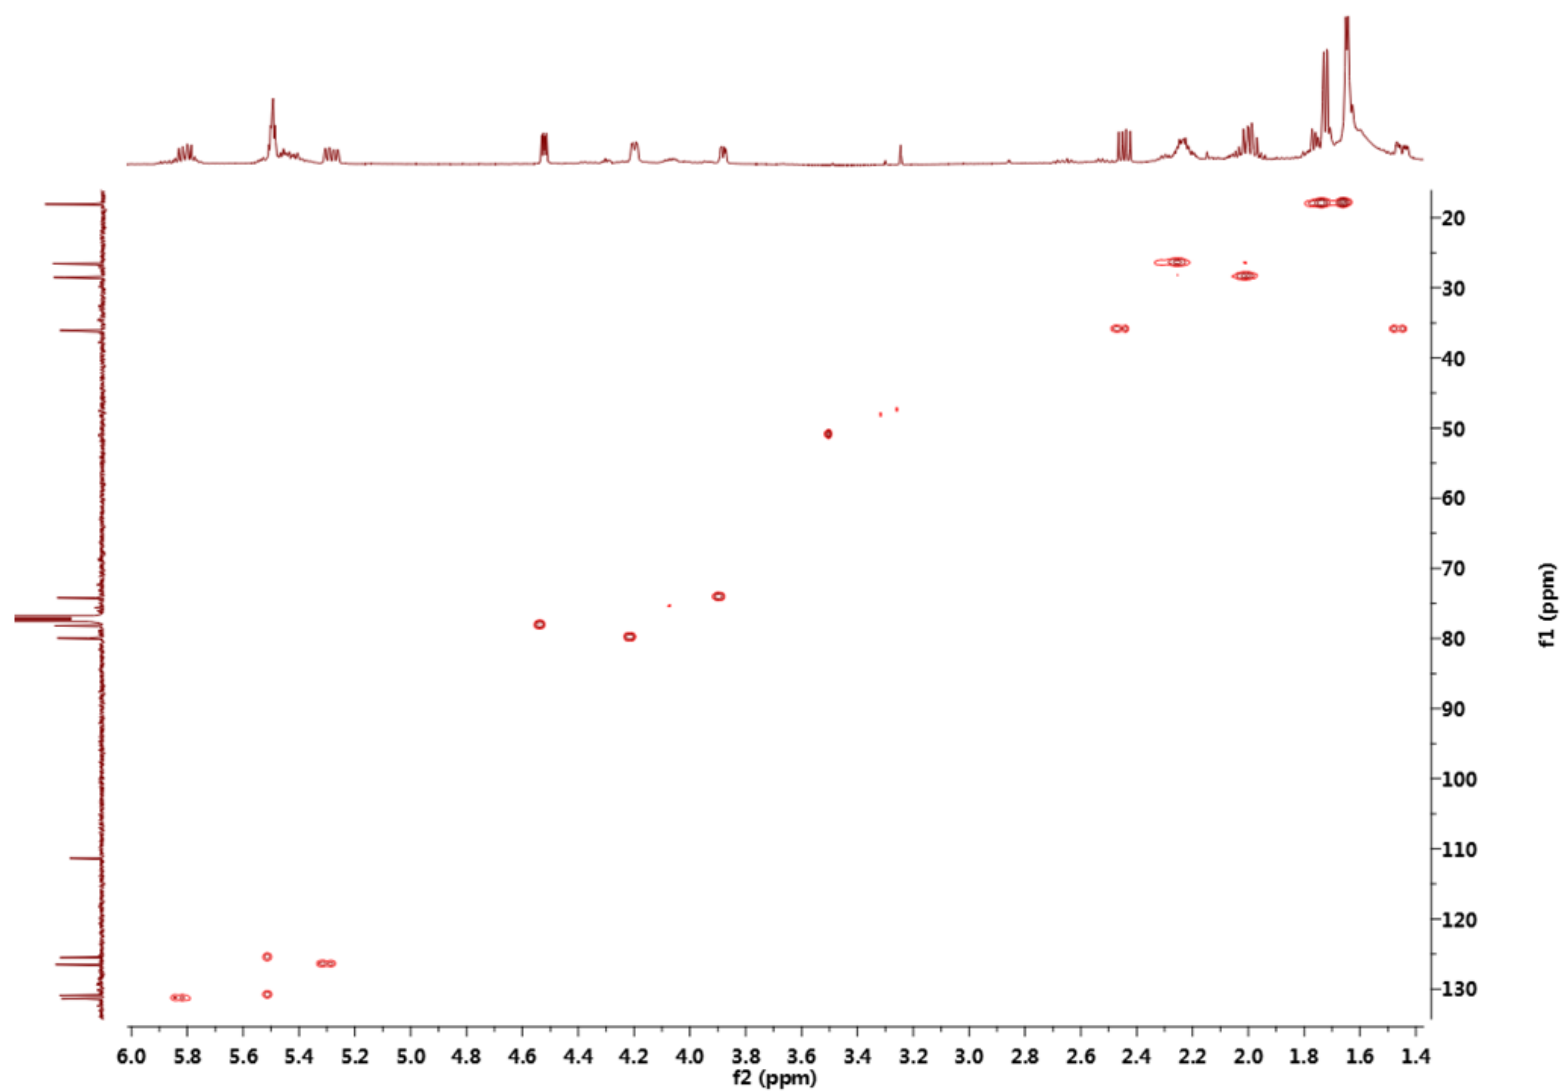

**Figure S3.** HSQC spectrum of compound **1** in CDCl<sub>3</sub>

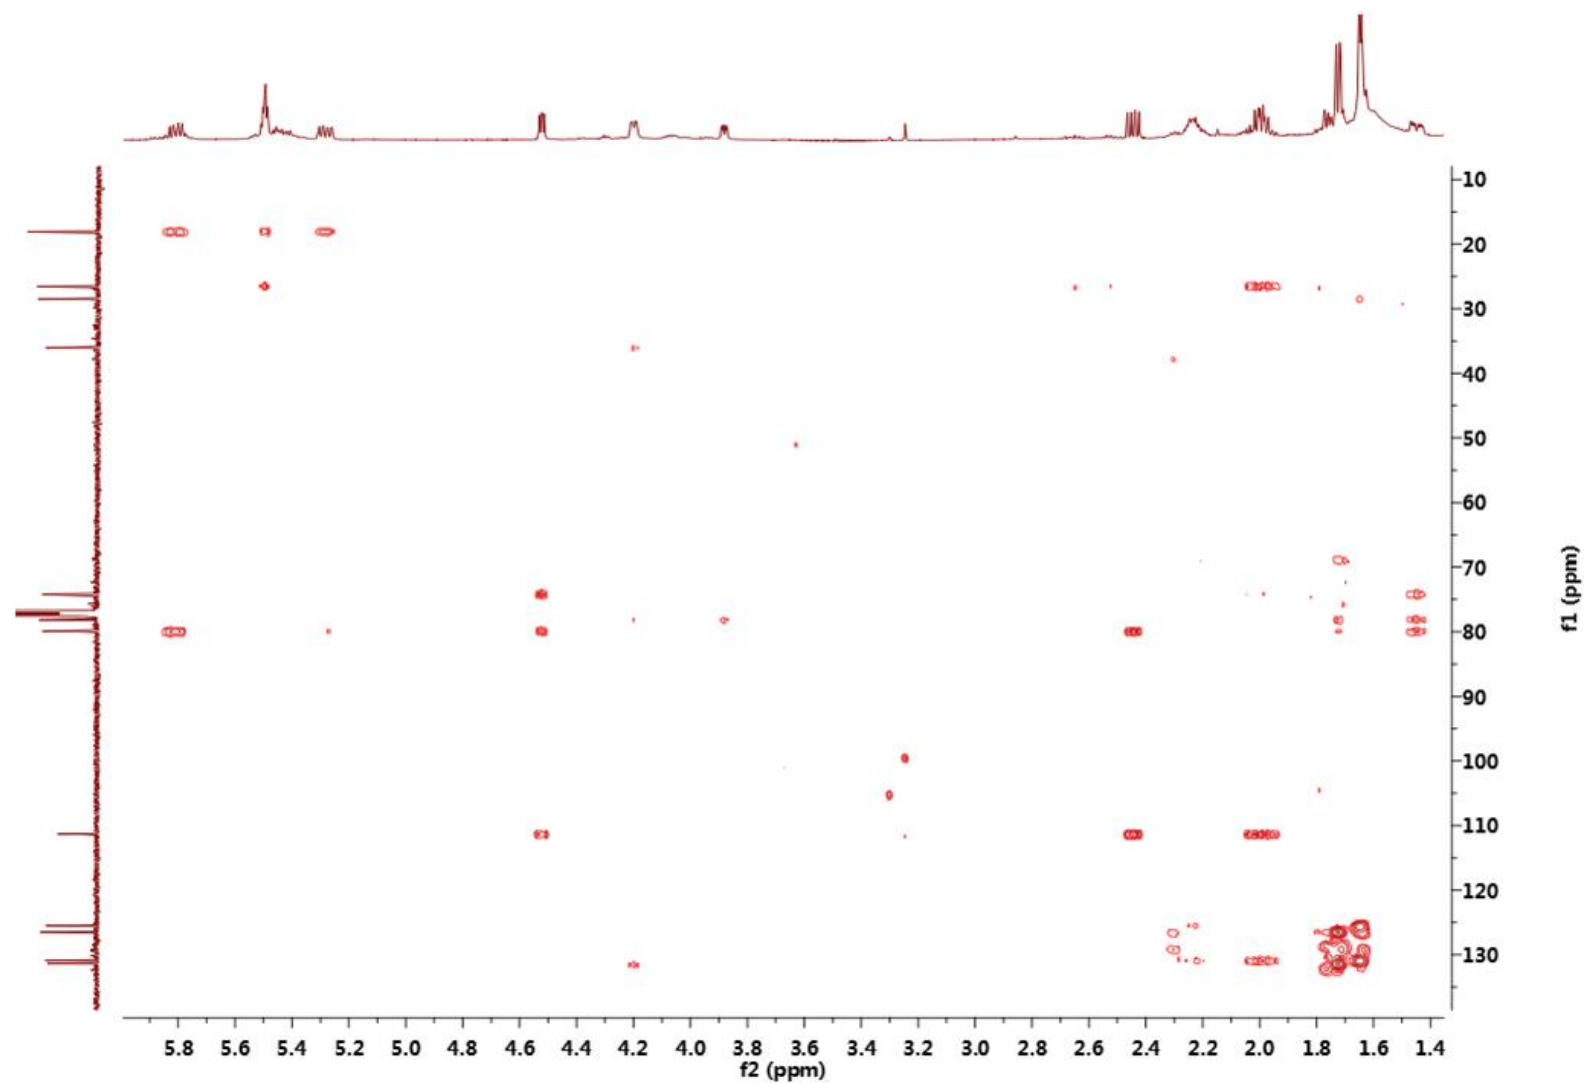

**Figure S4.** HMBC spectrum of compound **1** in CDCl<sub>3</sub>

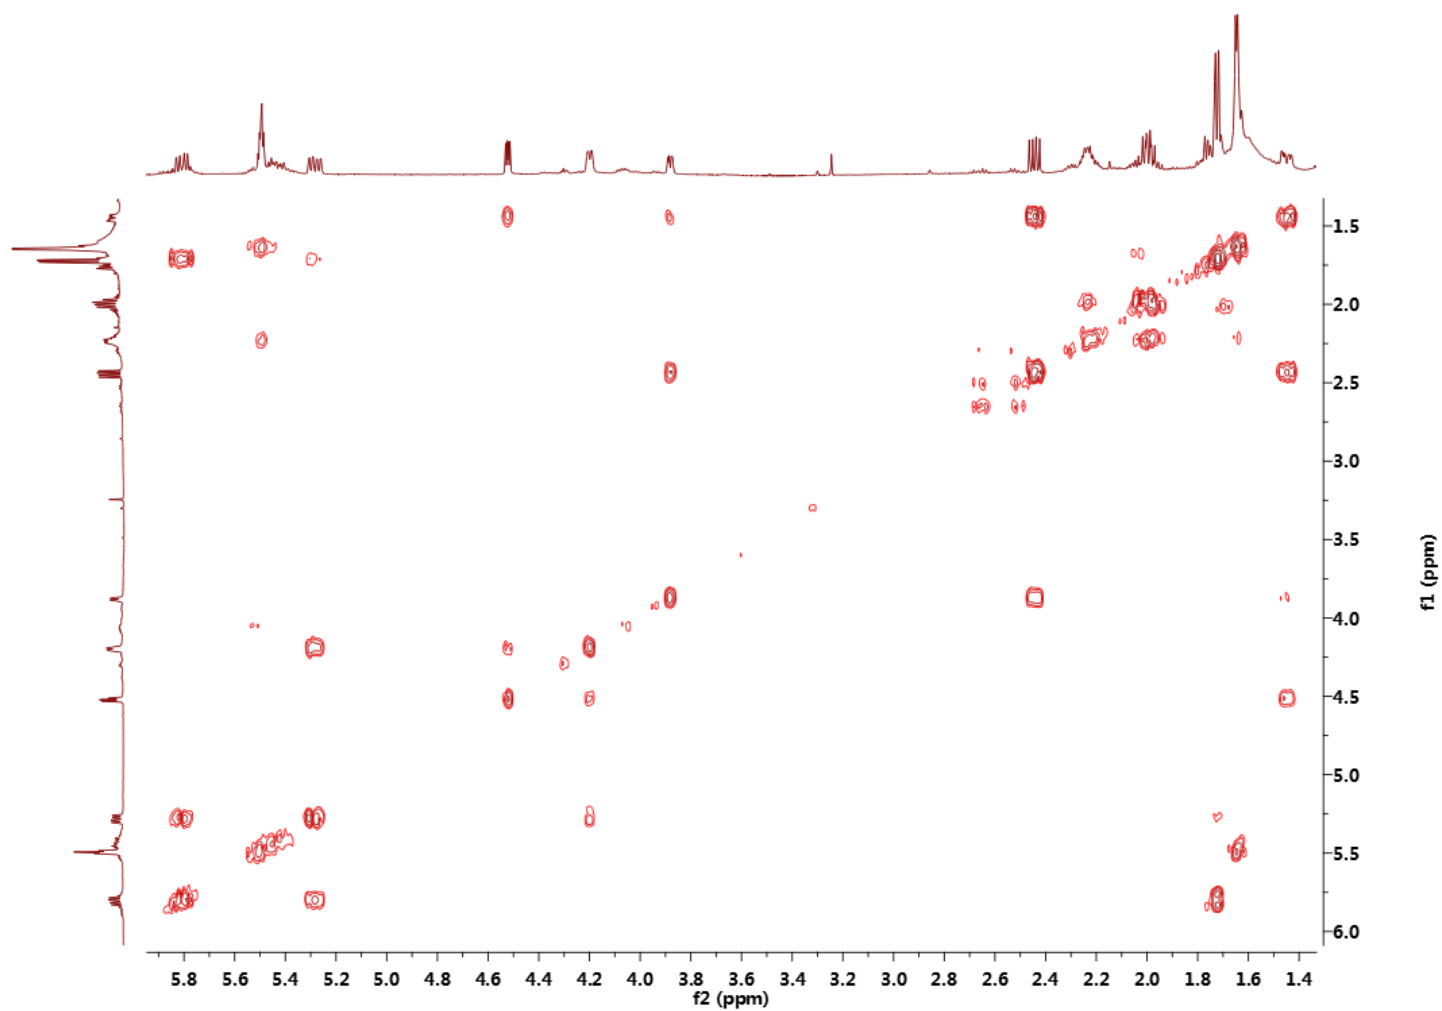

**Figure S5.** COSY spectrum of compound **1** in CDCl<sub>3</sub>



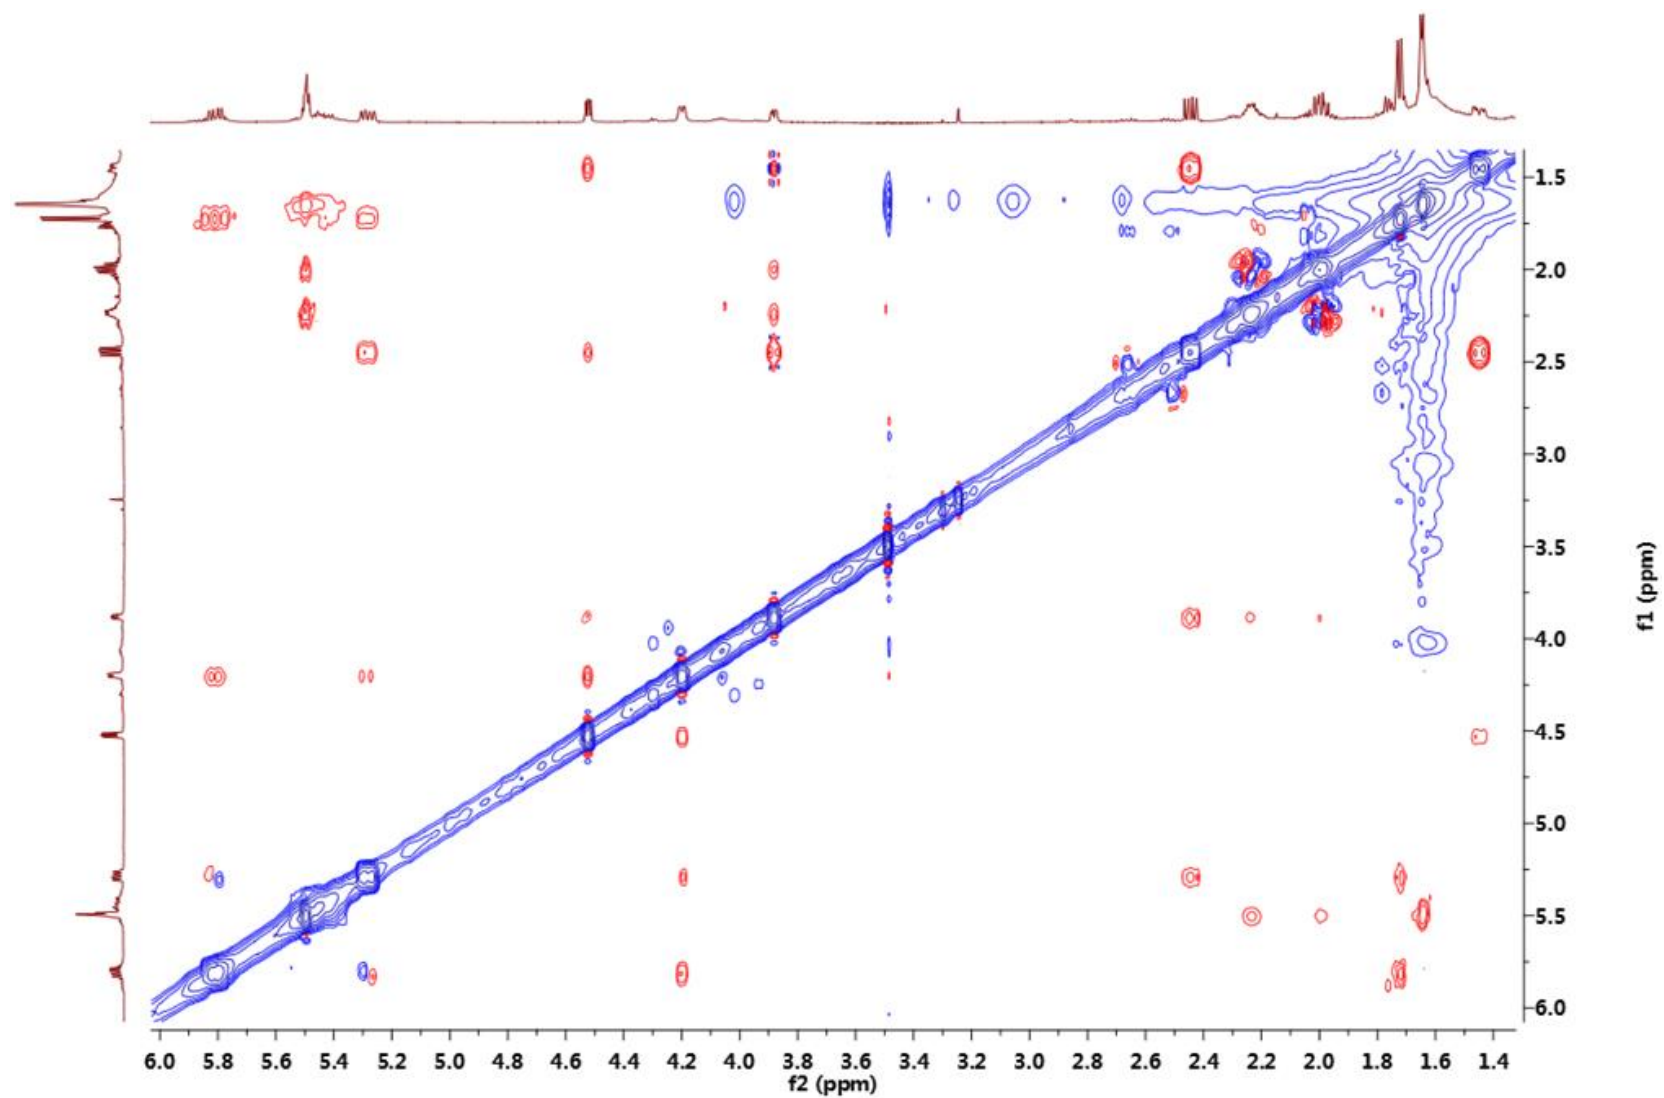

**Figure S6.** NOESY spectrum of compound **1** in CDCl<sub>3</sub>

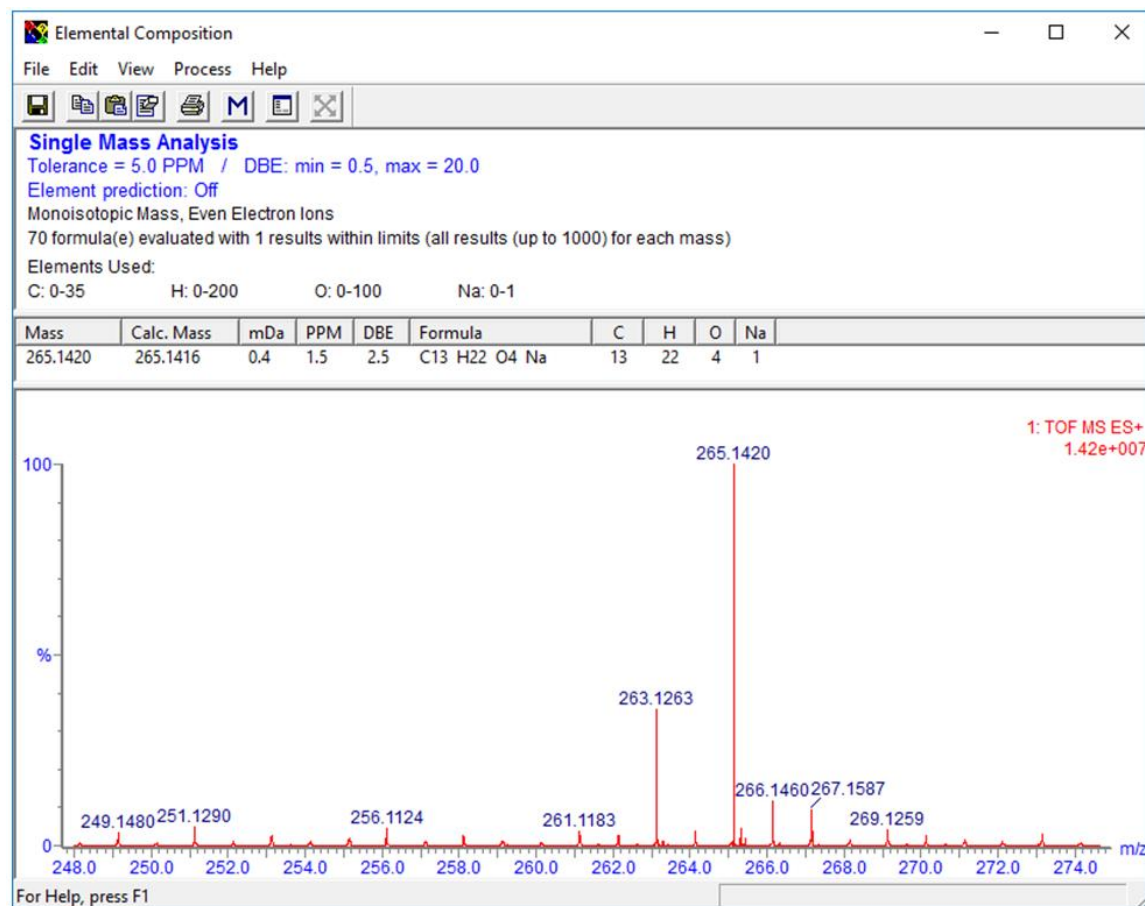

**Figure S7.** HRESIMS spectrum of compound **1**

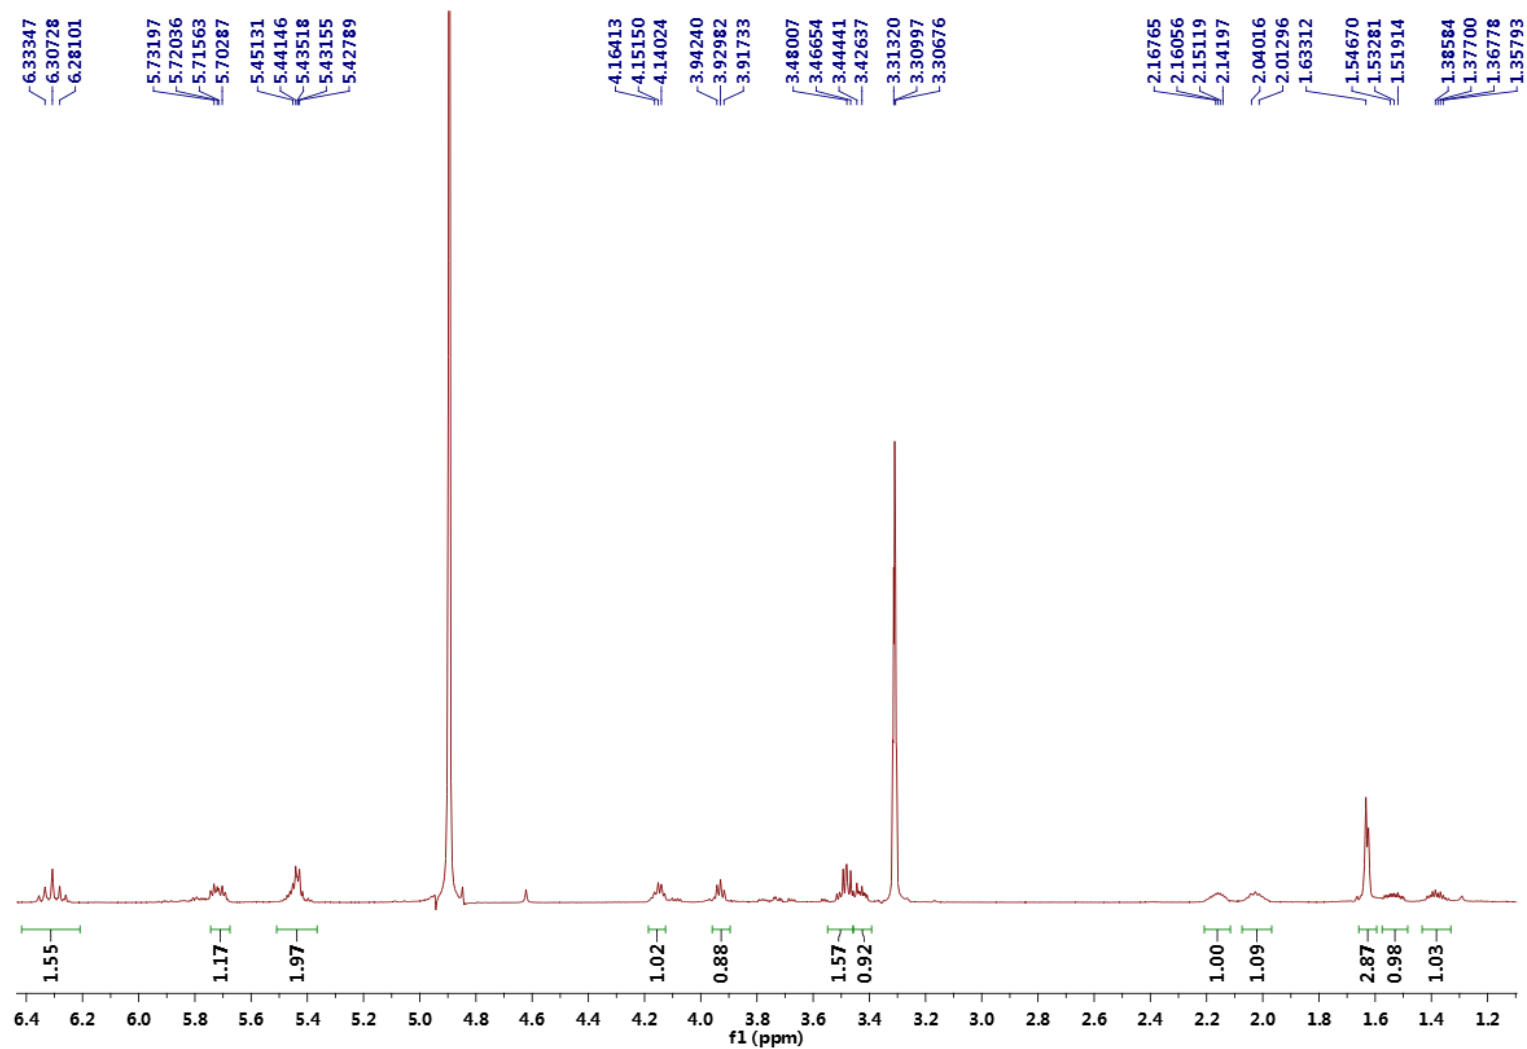

**Figure S8.**  $^1\text{H}$  NMR spectrum of compound **2** in  $\text{CD}_3\text{OD}$

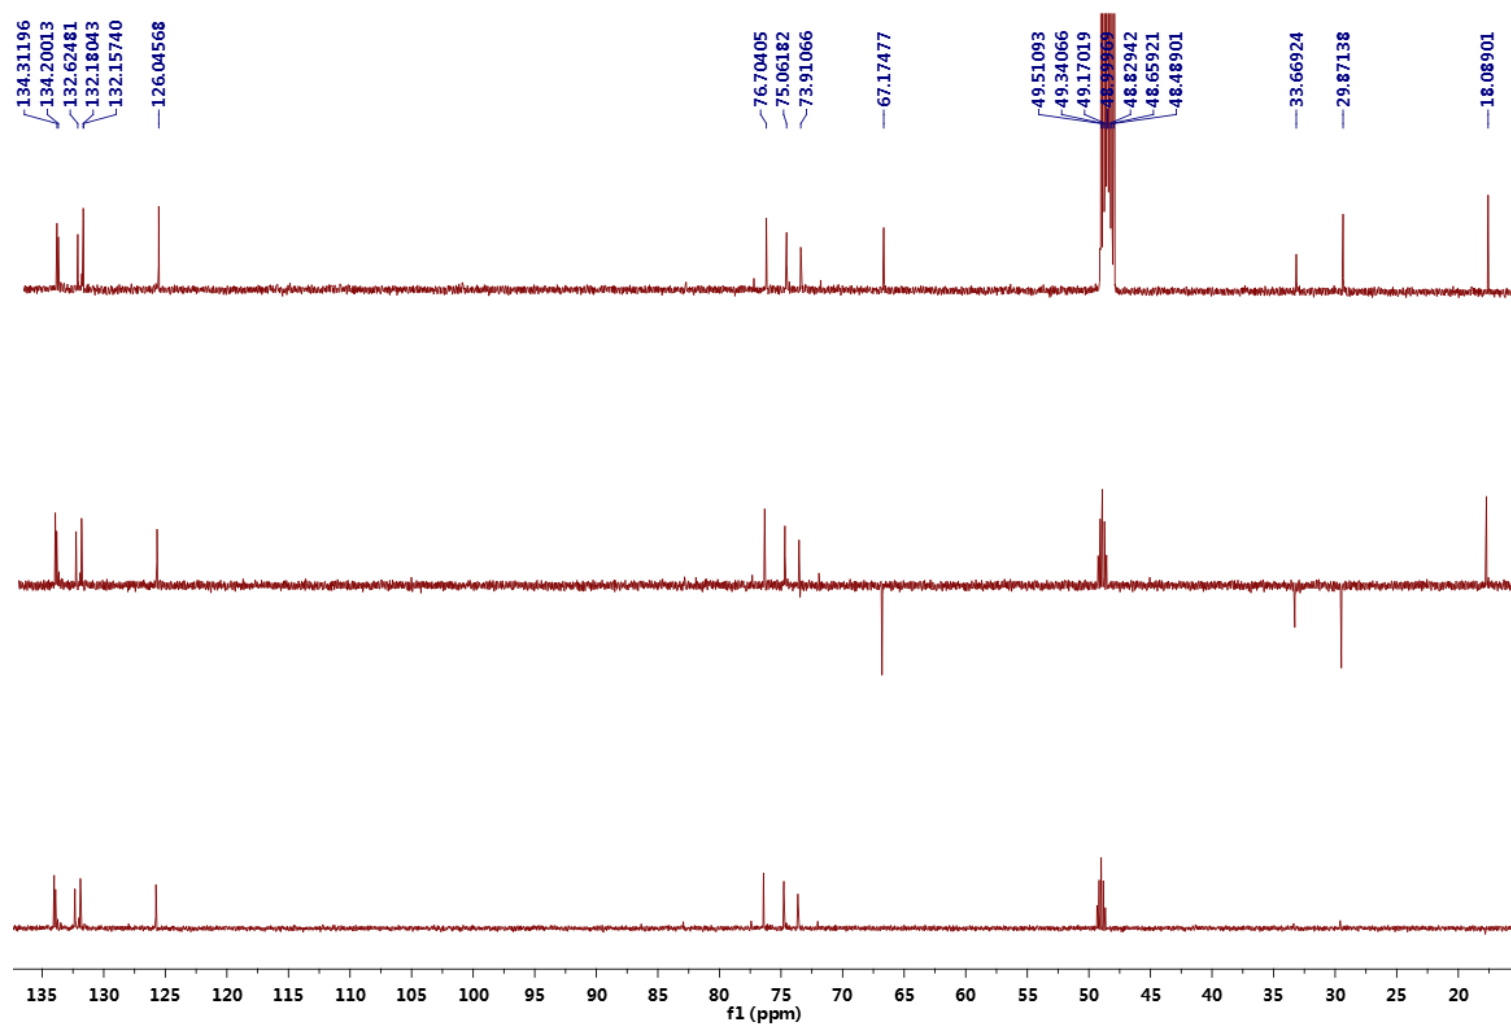

**Figure S9.**  $^{13}\text{C}$  NMR and DEPT spectra of compound **2** in  $\text{CD}_3\text{OD}$

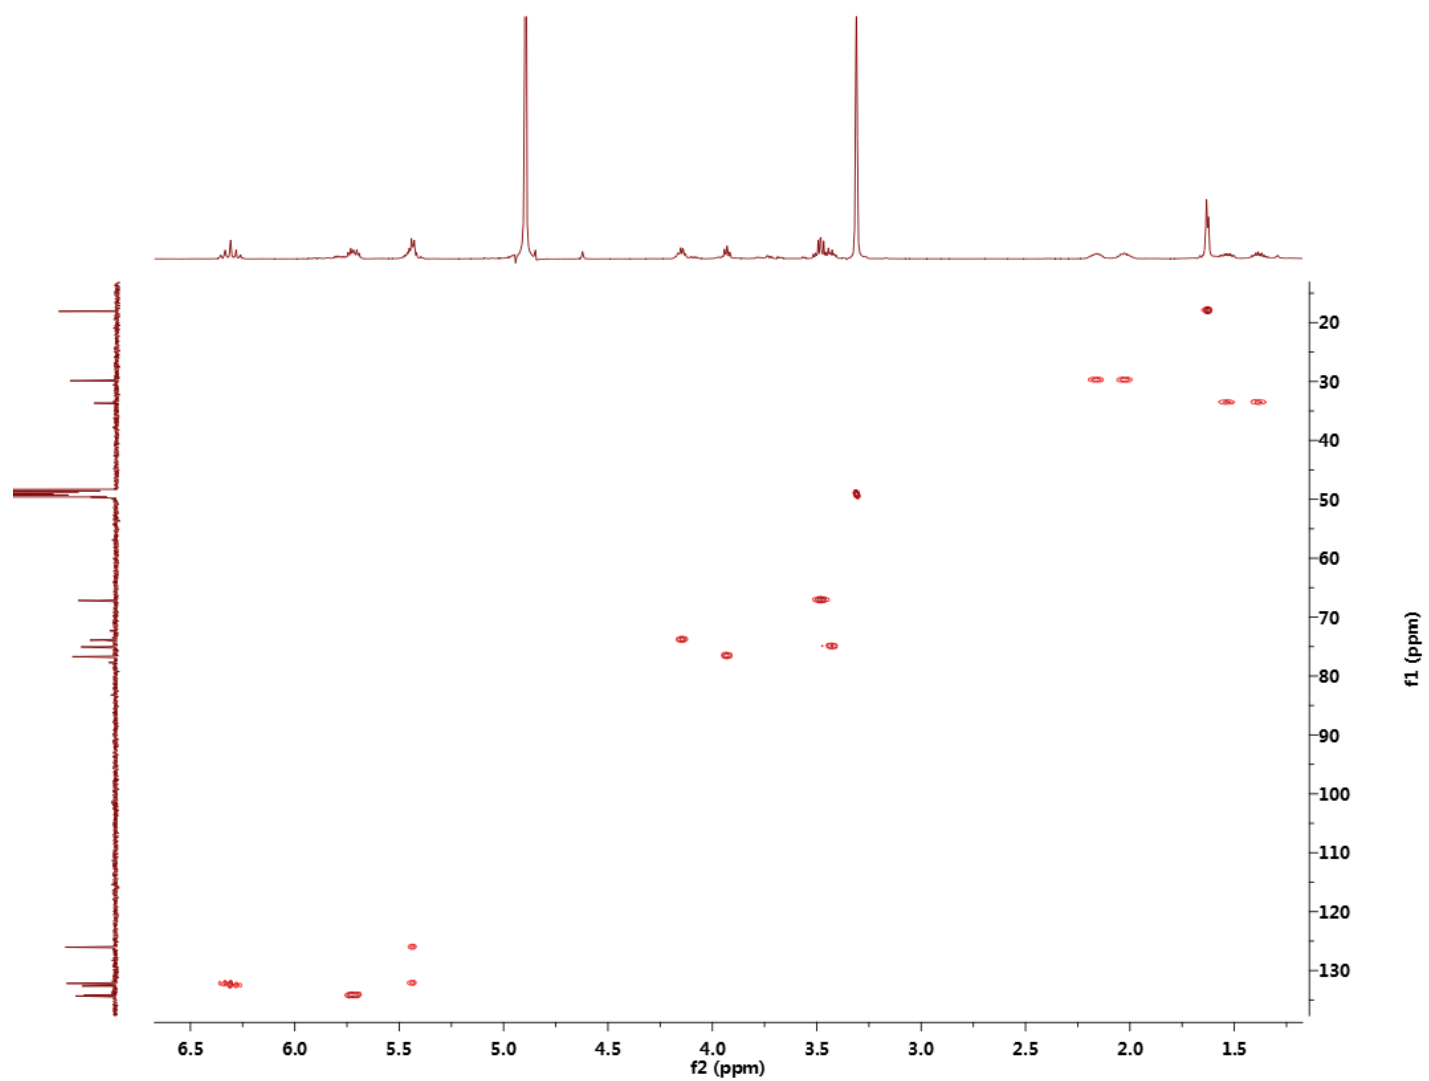

**Figure S10.** HSQC spectrum of compound **2** in CD<sub>3</sub>OD

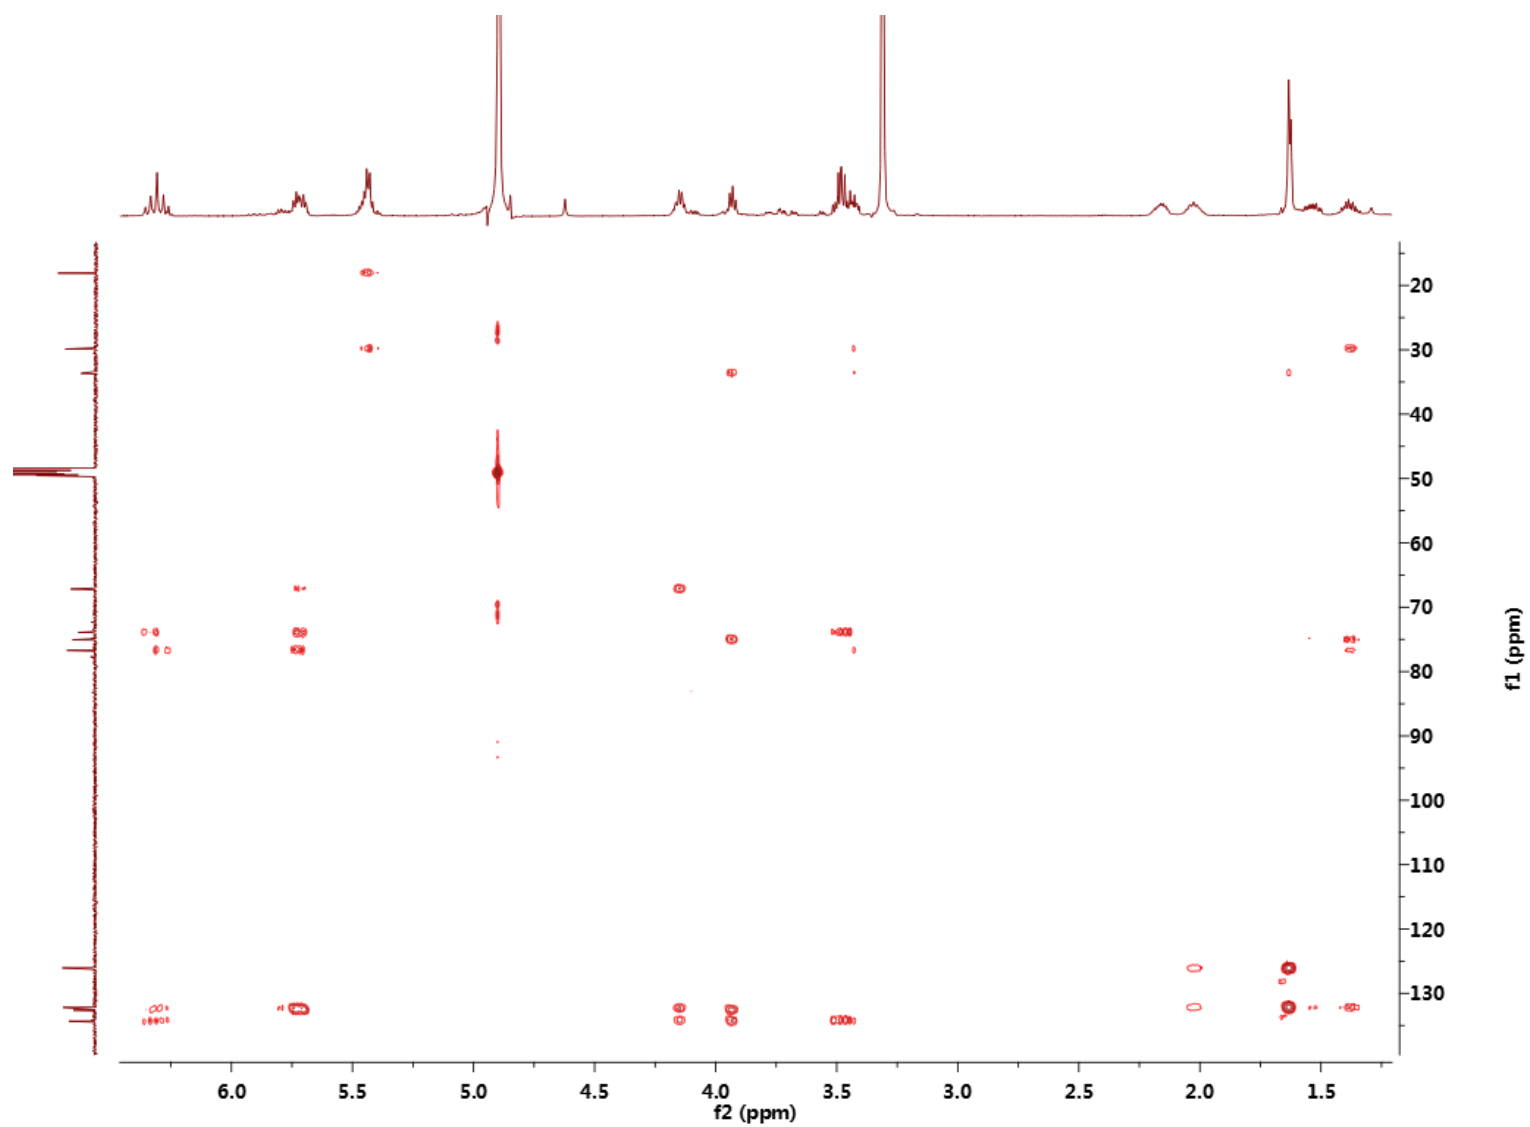

**Figure S11.** HMBC spectrum of compound **2** in CD<sub>3</sub>OD

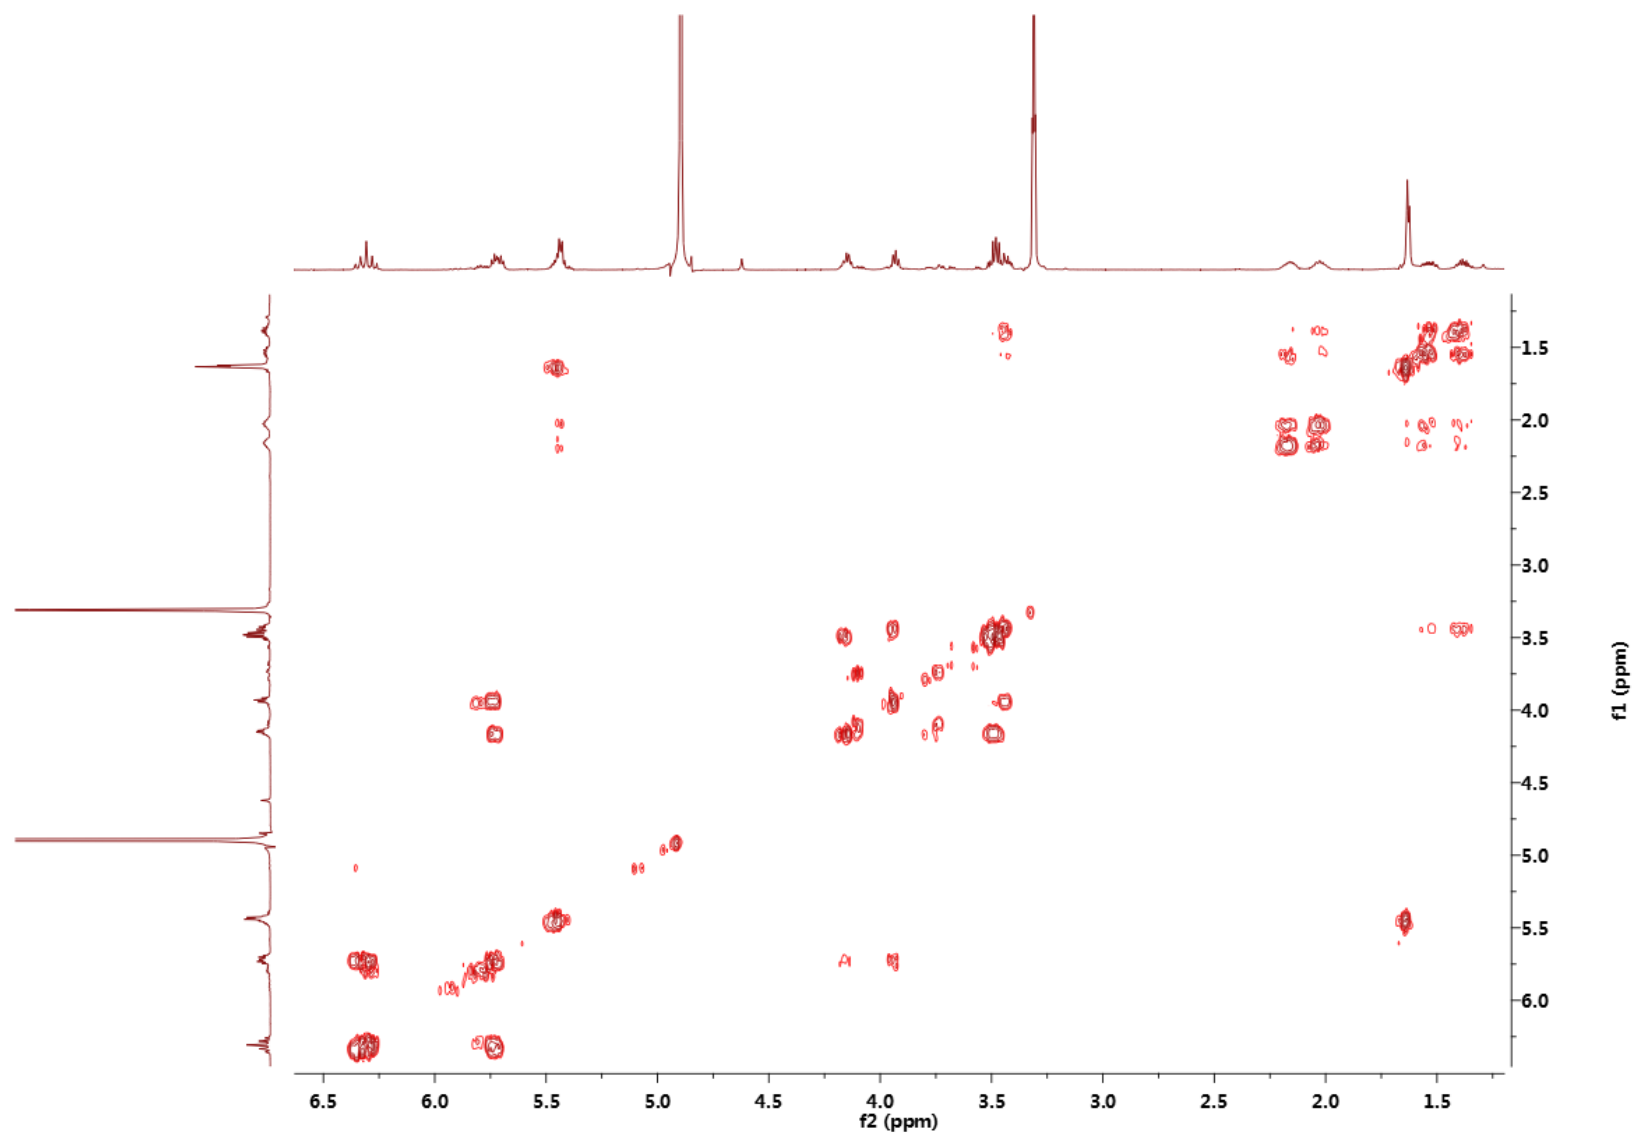

**Figure S12.** COSY spectrum of compound **2** in CD<sub>3</sub>OD

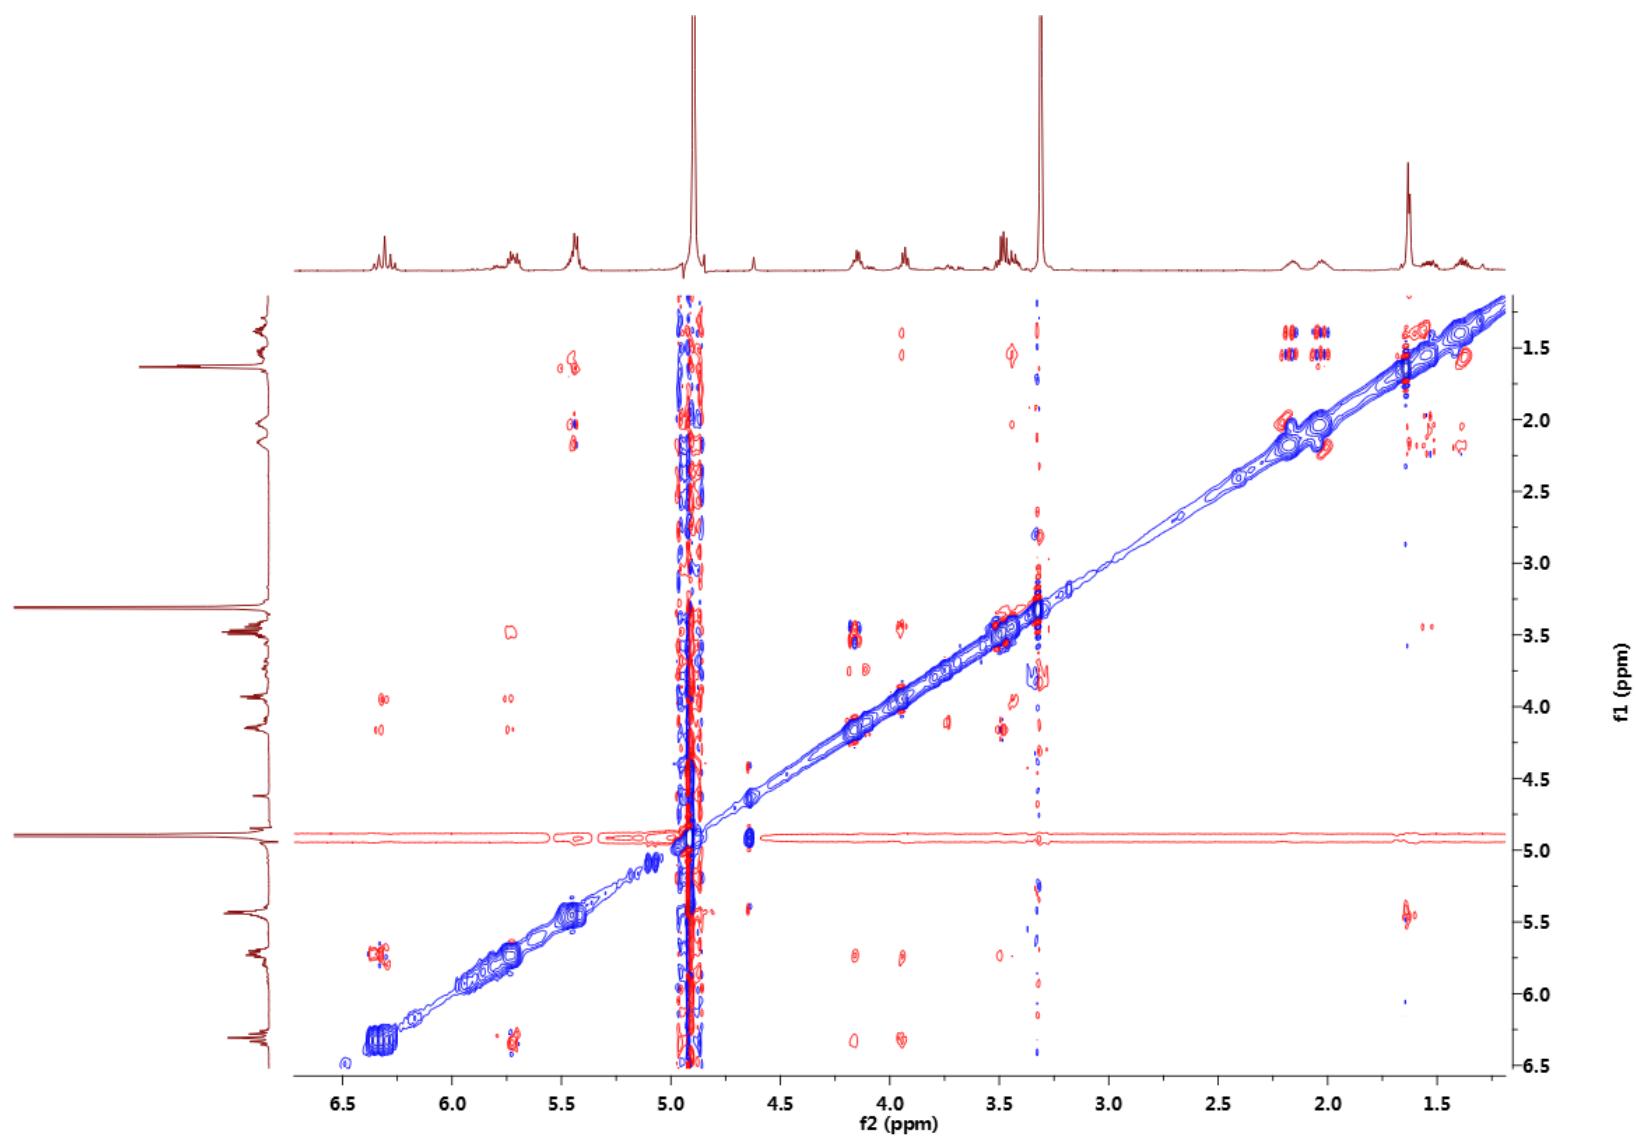

**Figure S13.** NOESY spectrum of compound **2** in CD<sub>3</sub>OD



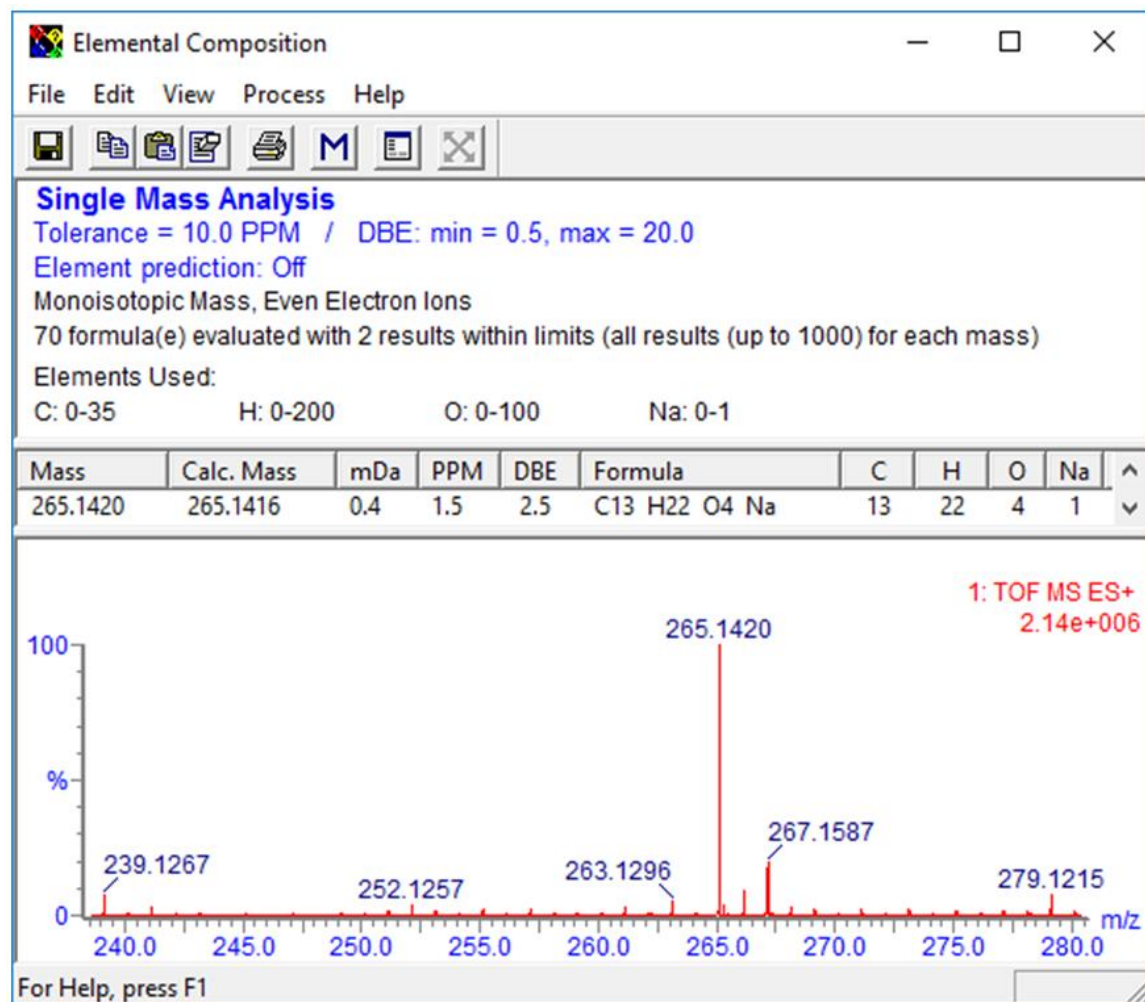

**Figure S14.** HRESIMS spectrum of compound **2**

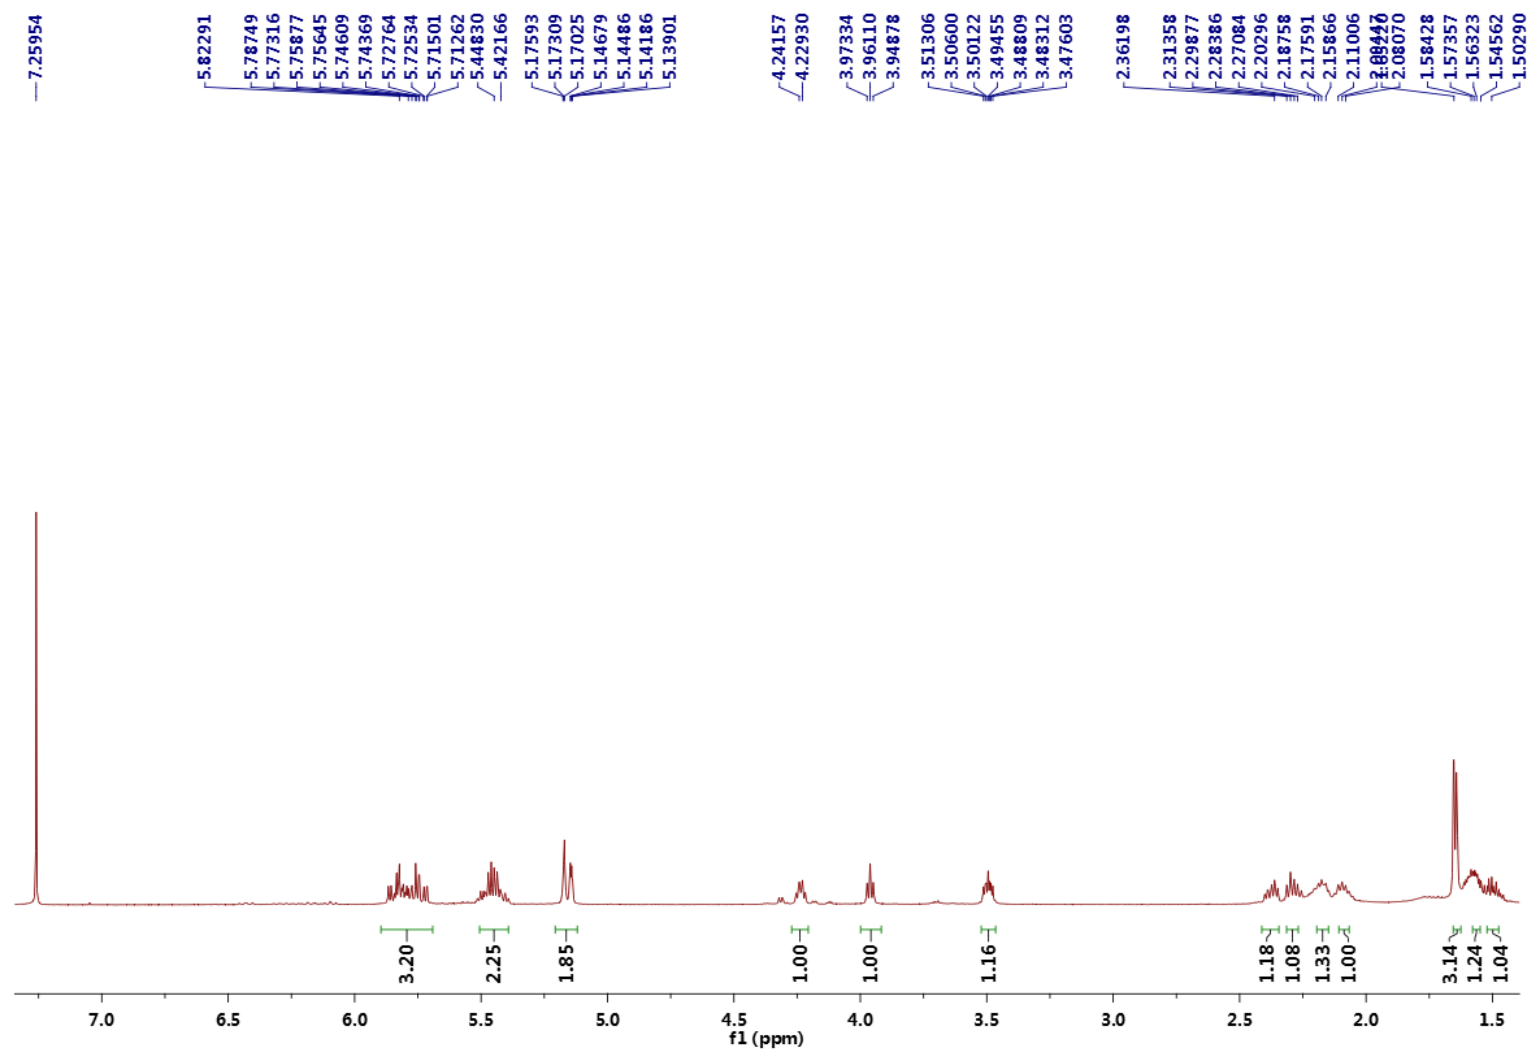

**Figure S15.** <sup>1</sup>H NMR spectrum of compound **3** in CDCl<sub>3</sub>

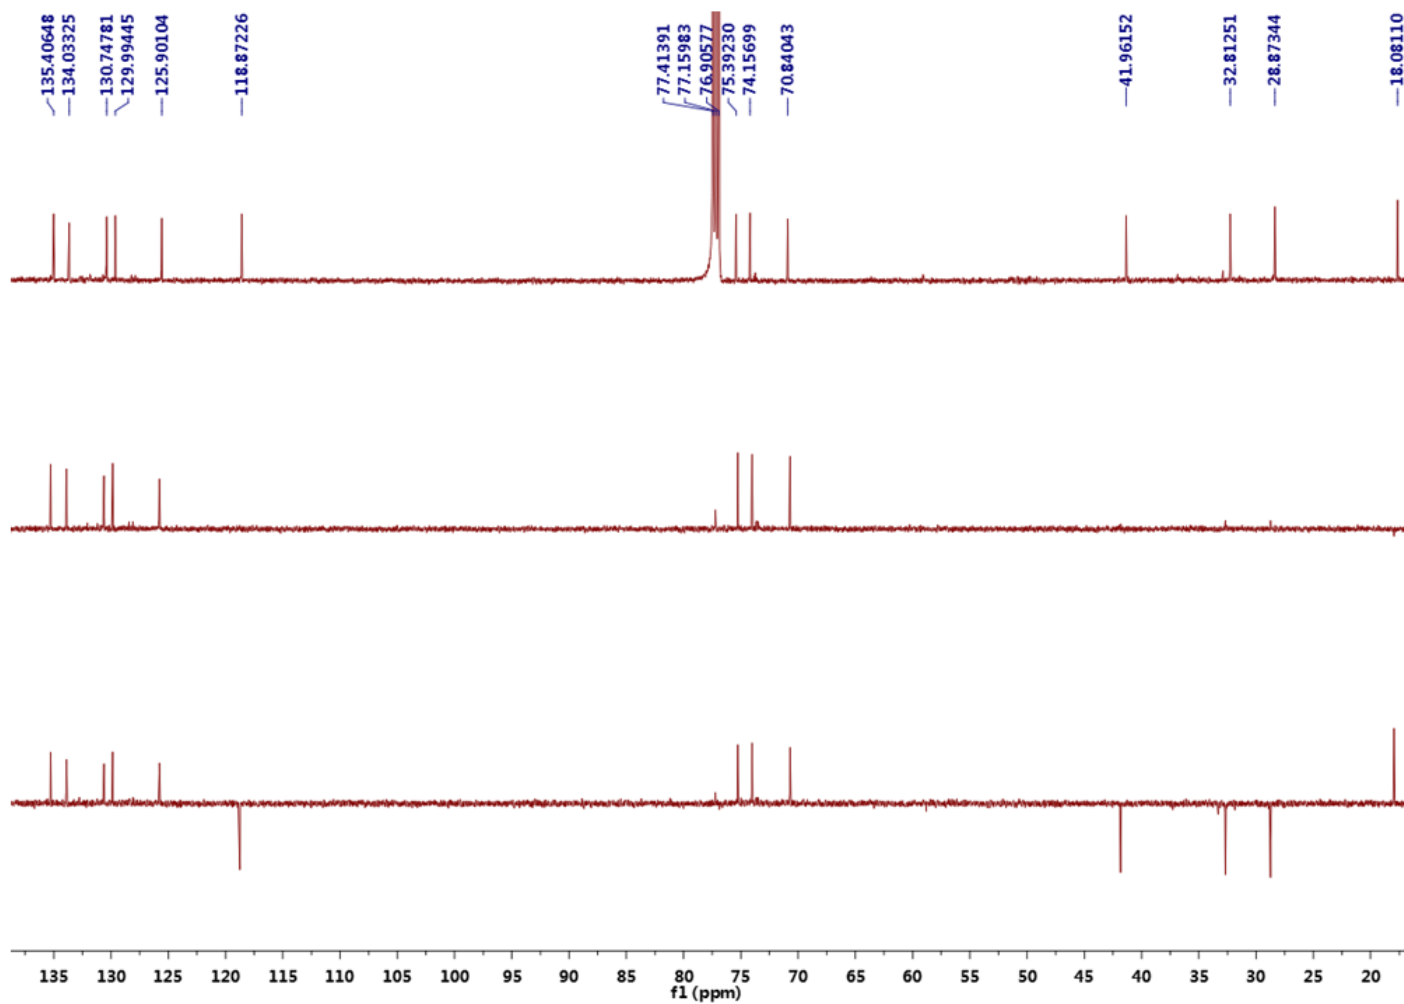

**Figure S16.** <sup>13</sup>C NMR and DEPT spectra of compound **3** in CDCl<sub>3</sub>

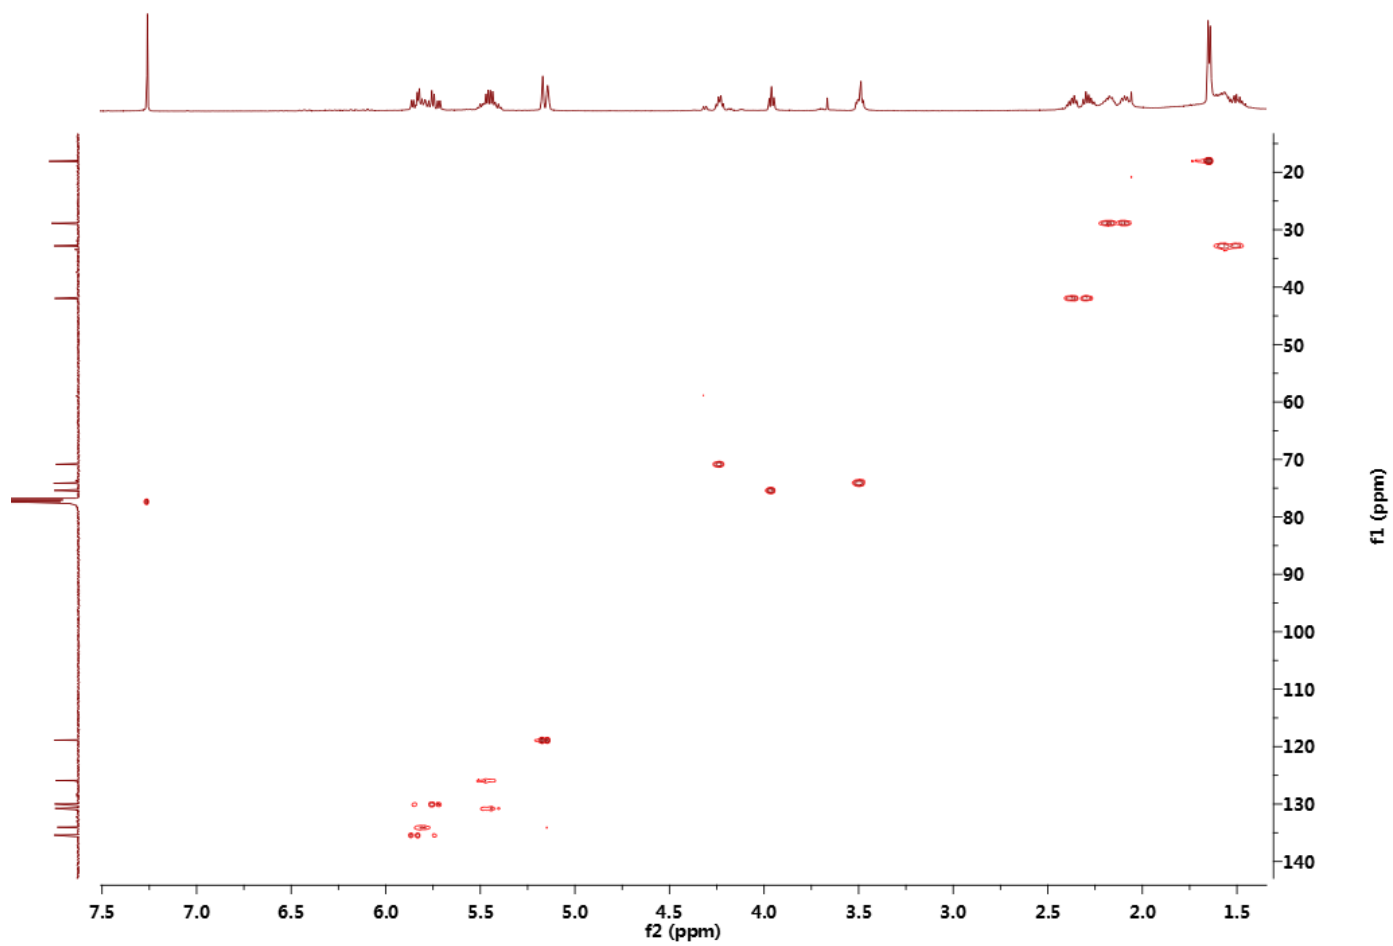

**Figure S17.** HSQC spectrum of compound **3** in CDCl<sub>3</sub>

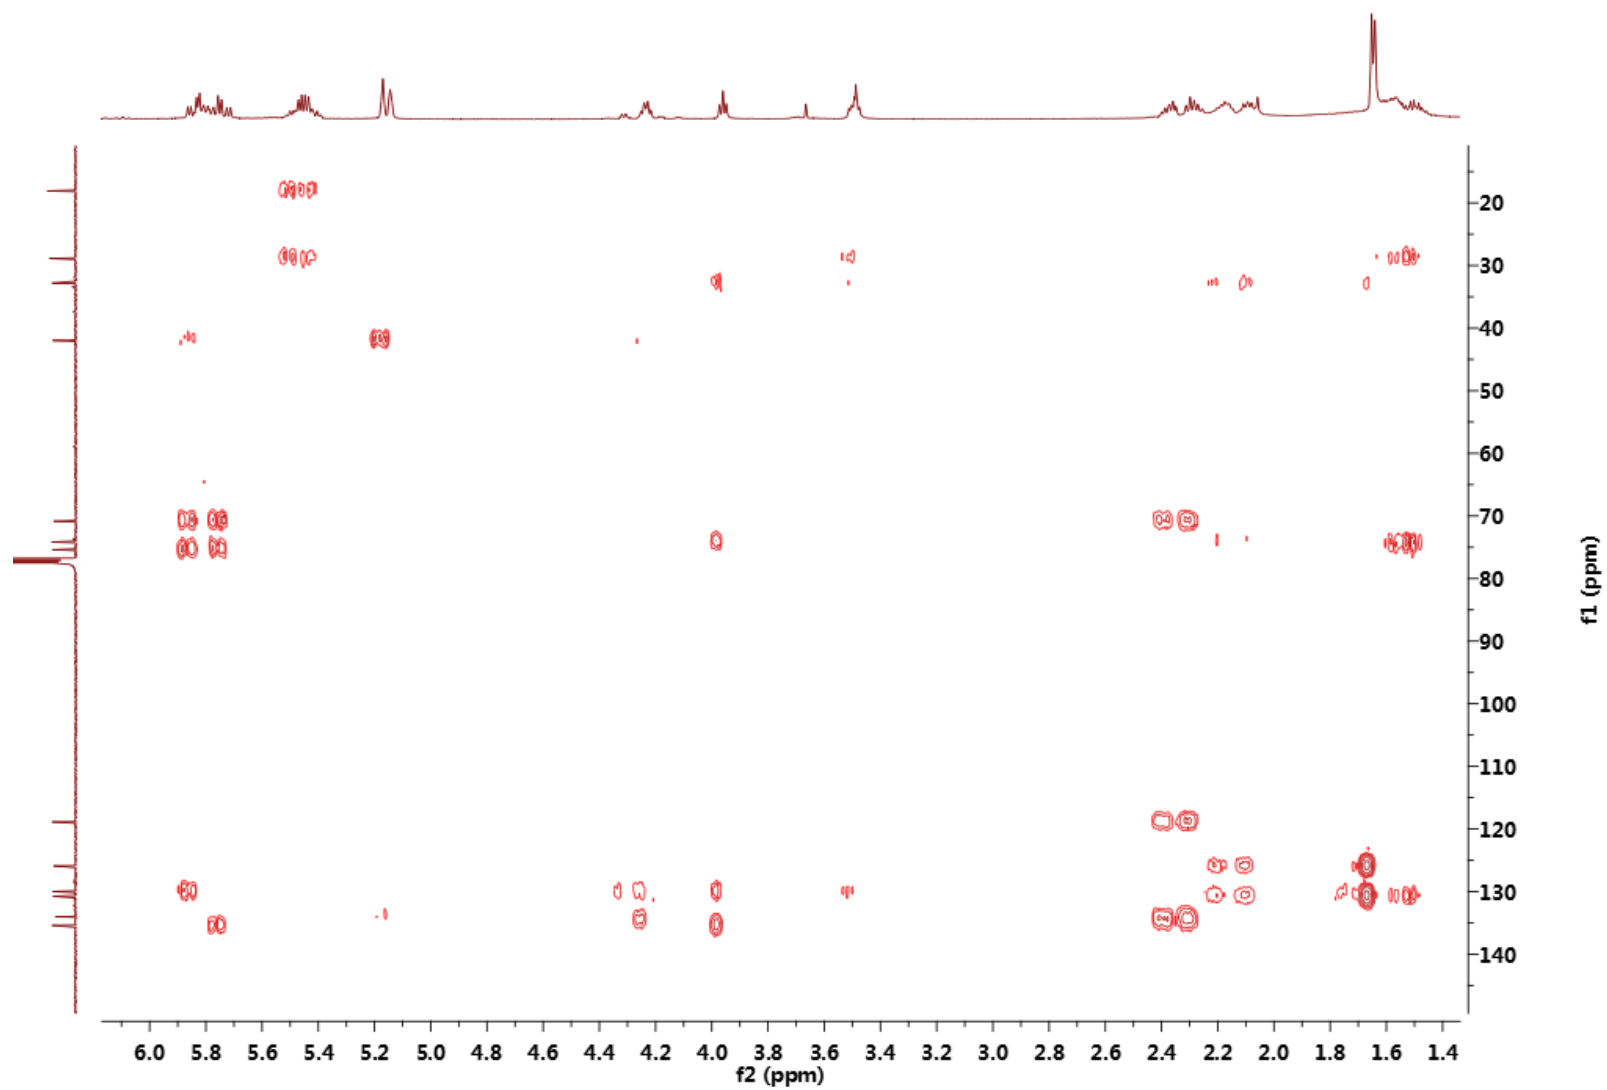

**Figure S18.** HMBC spectrum of compound **3** in CDCl<sub>3</sub>

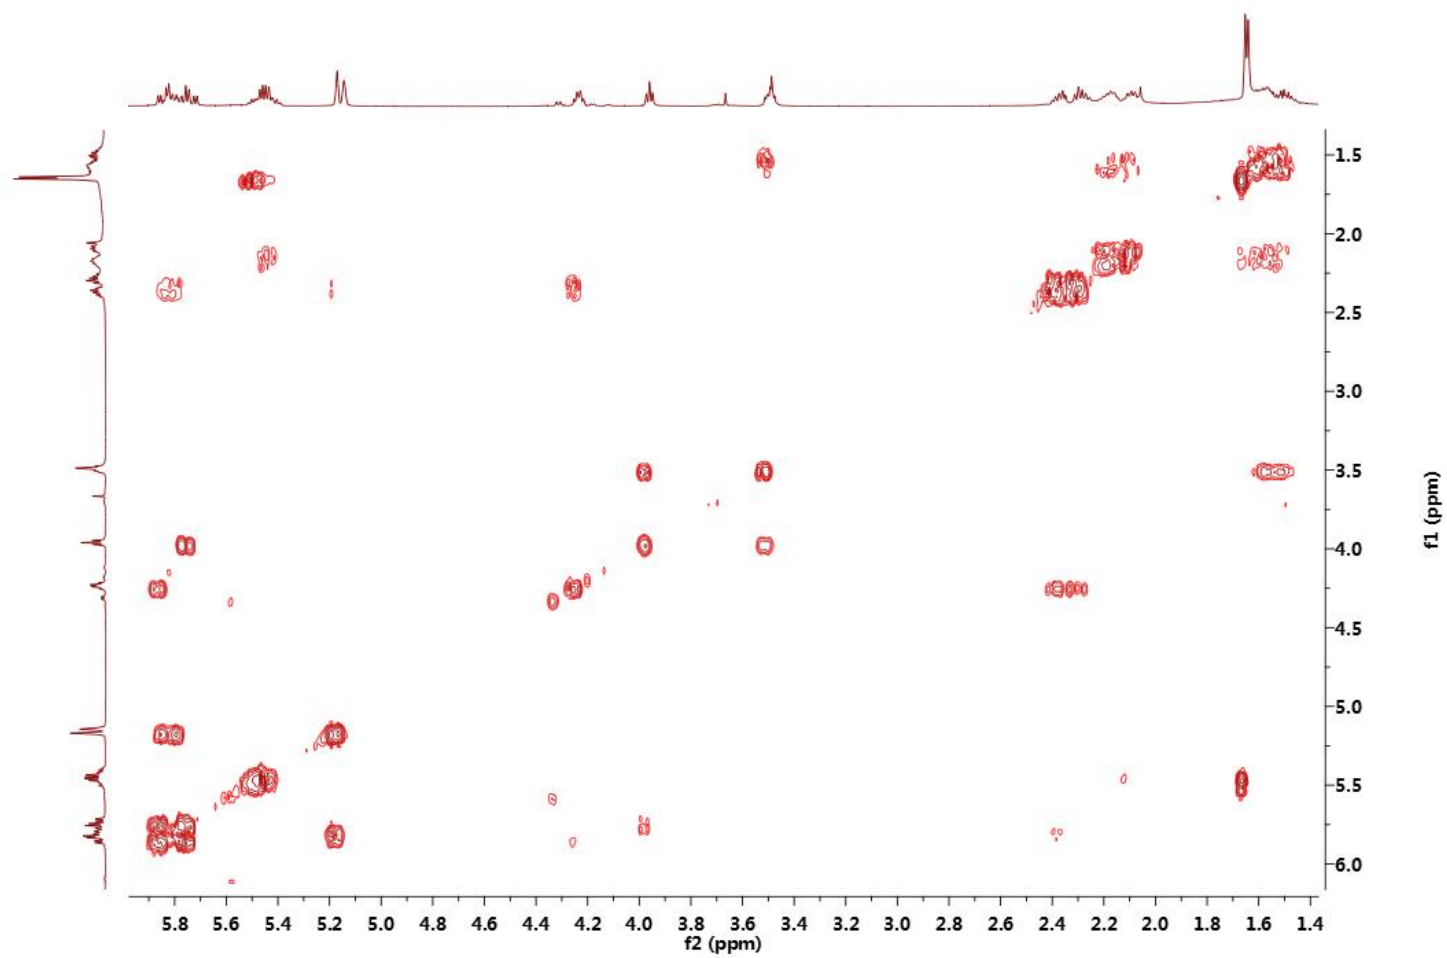

**Figure S19.** COSY spectrum of compound **3** in CDCl<sub>3</sub>

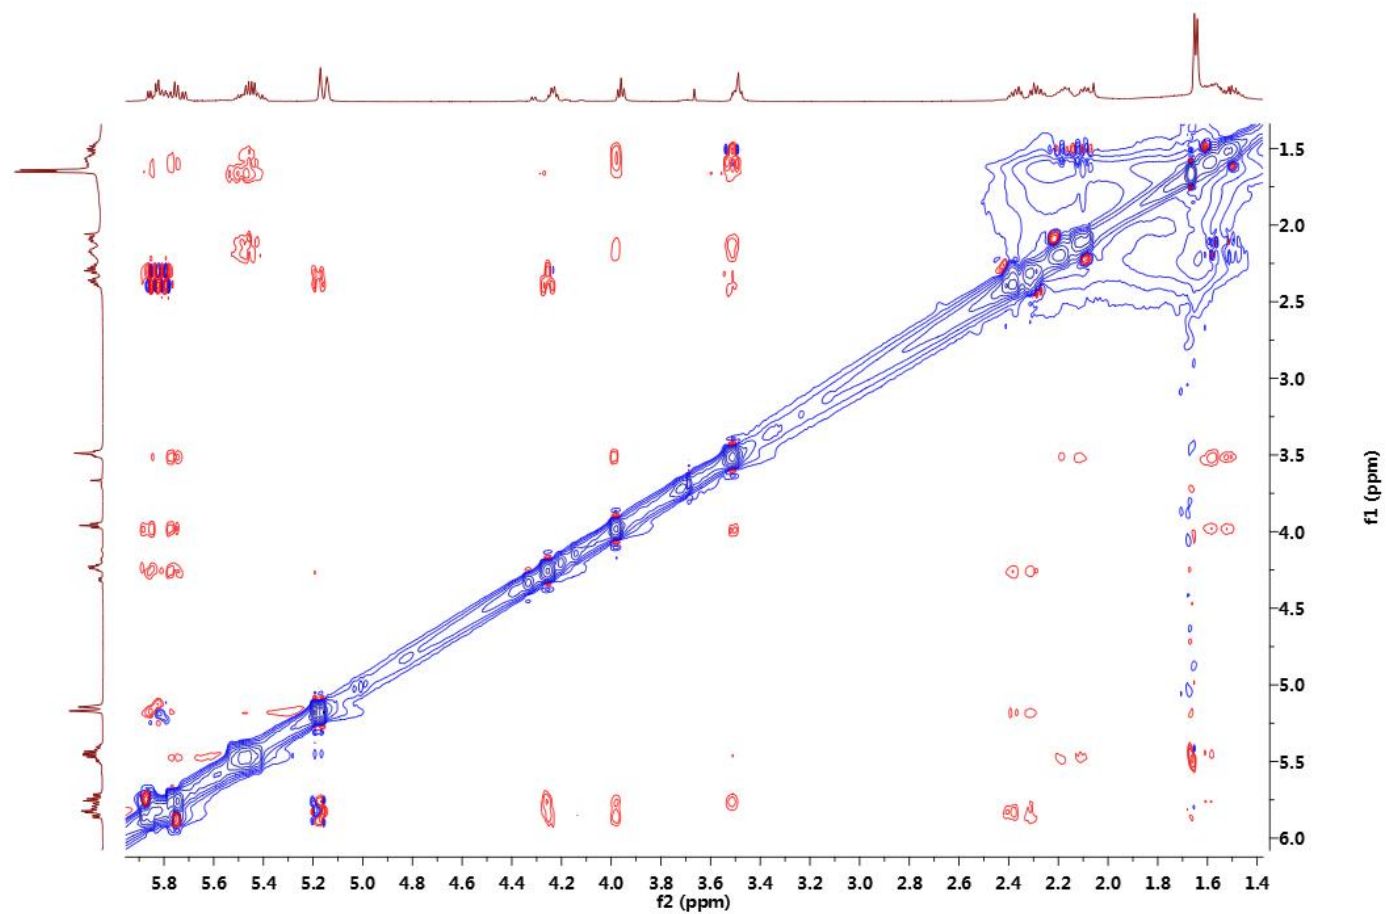

**Figure S20.** NOESY spectrum of compound **3** in  $\text{CDCl}_3$

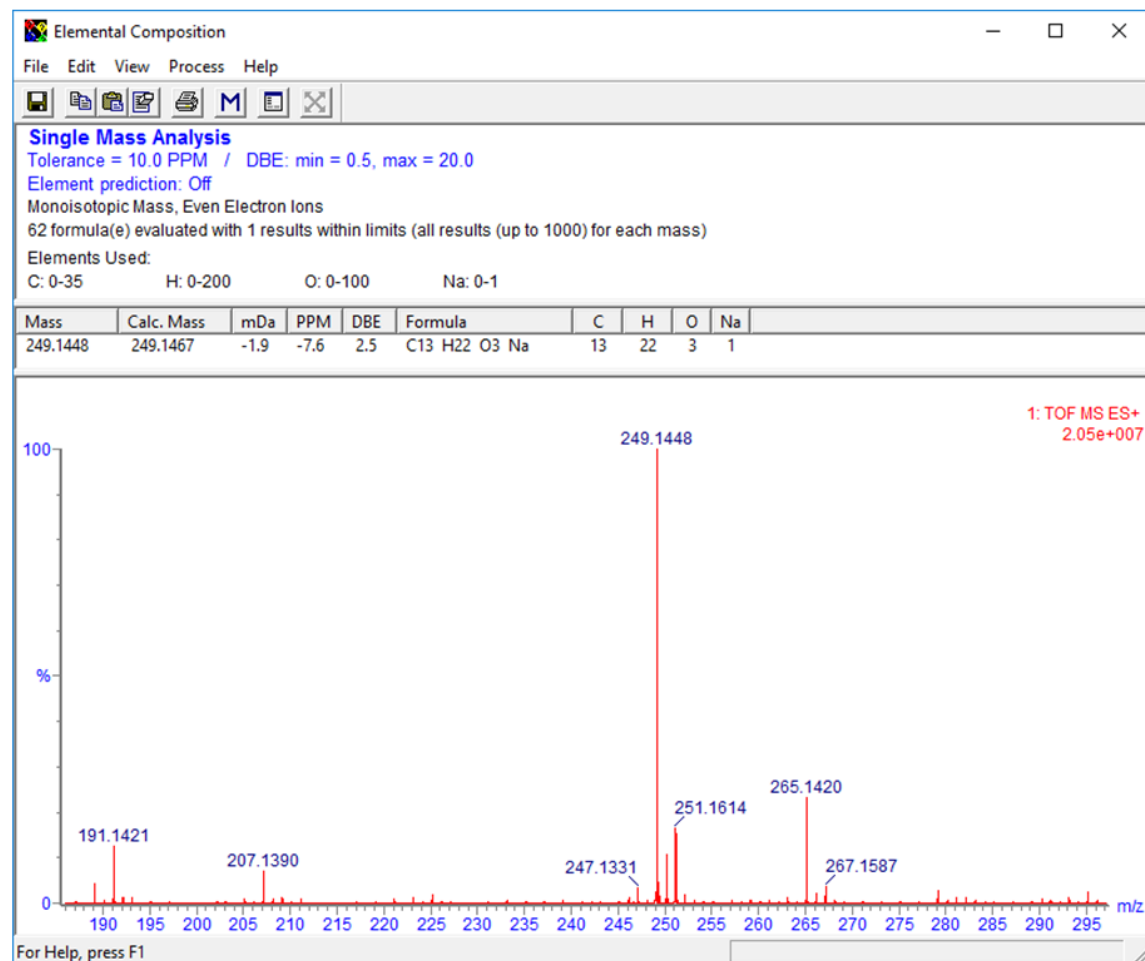

**Figure S21.** HRESIMS spectrum of compound **3**



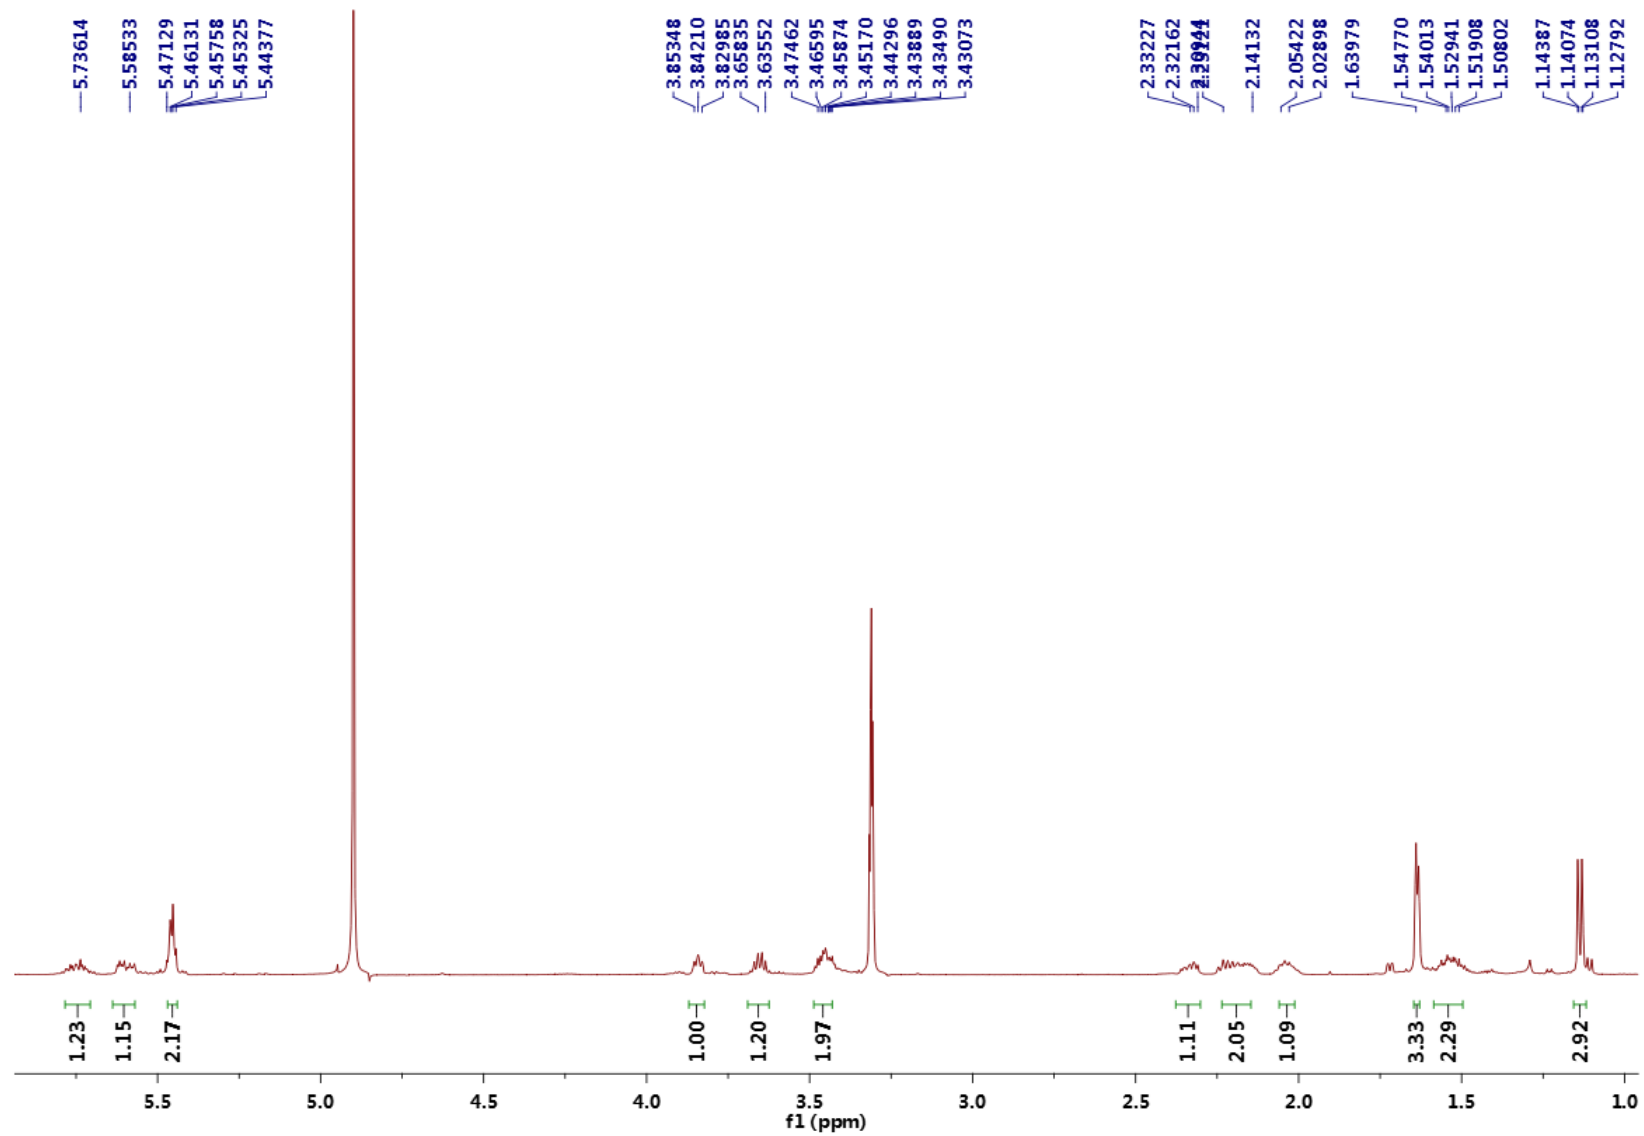

**Figure S22.**  $^1\text{H}$  NMR spectrum of compound **4** in  $\text{CD}_3\text{OD}$

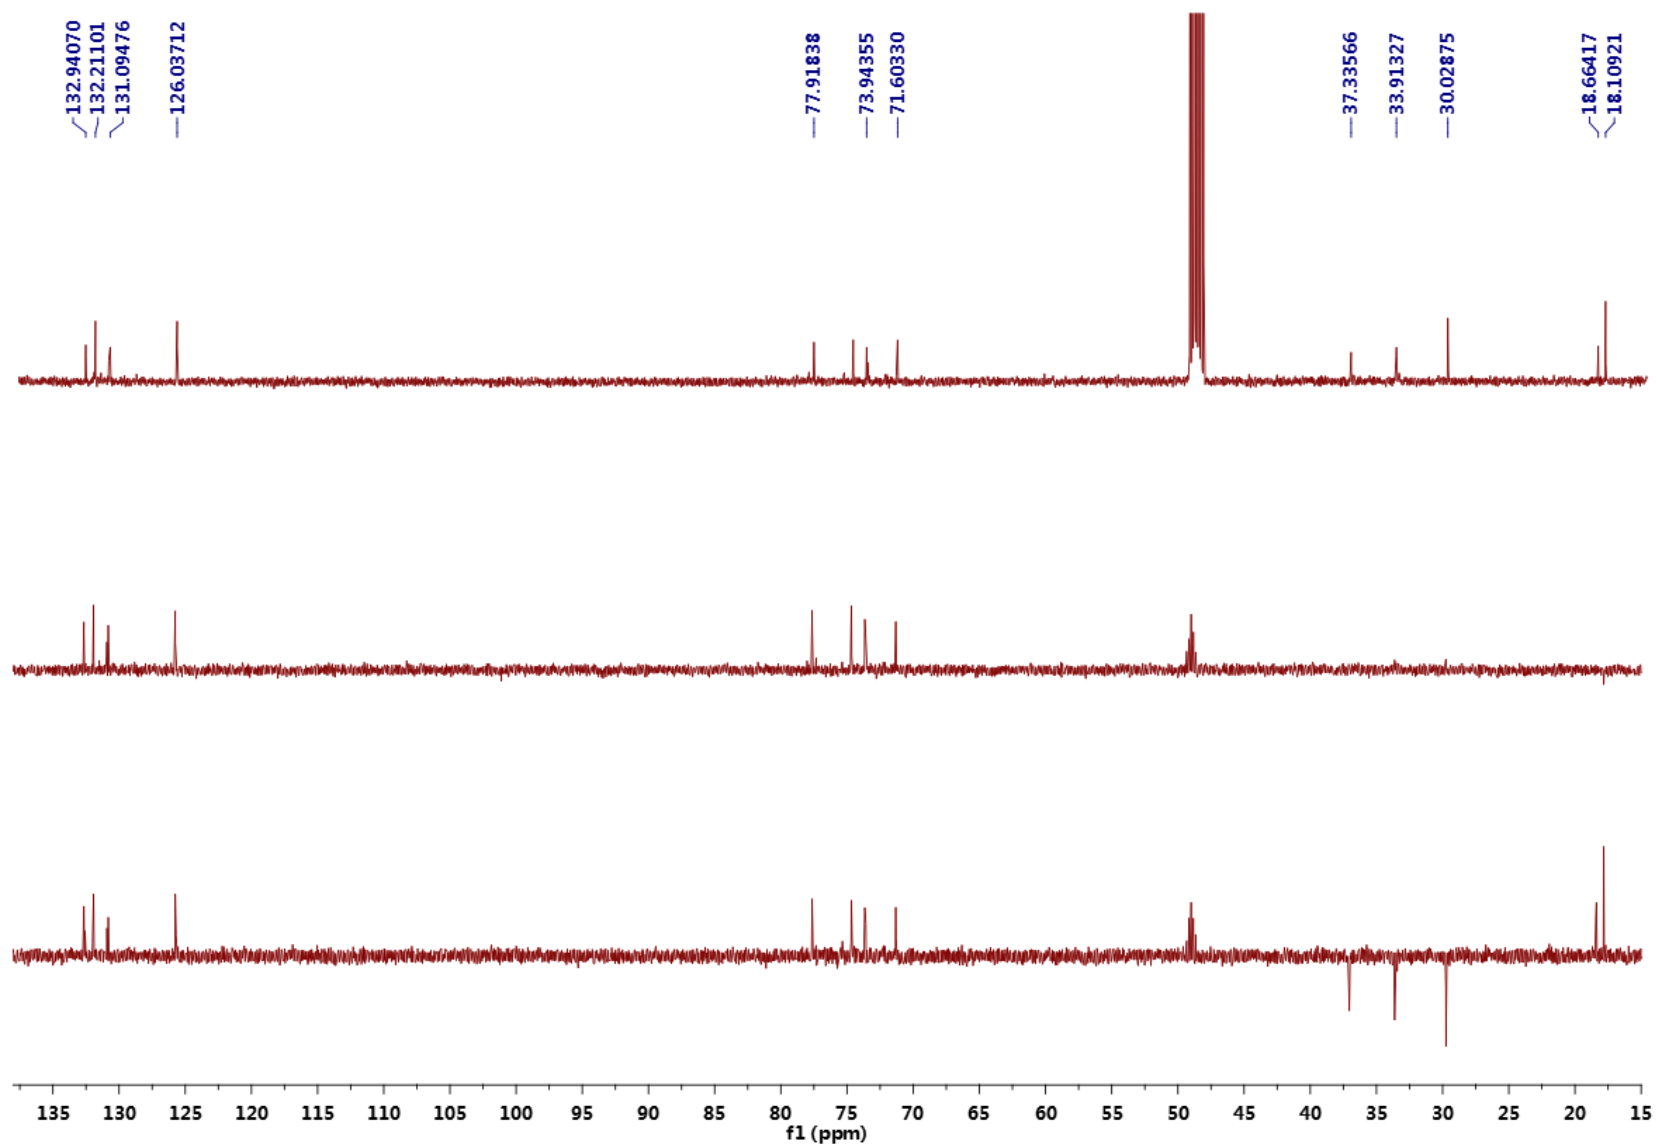

**Figure S23.** <sup>13</sup>C NMR and DEPT spectra of compound **4** in CD<sub>3</sub>OD

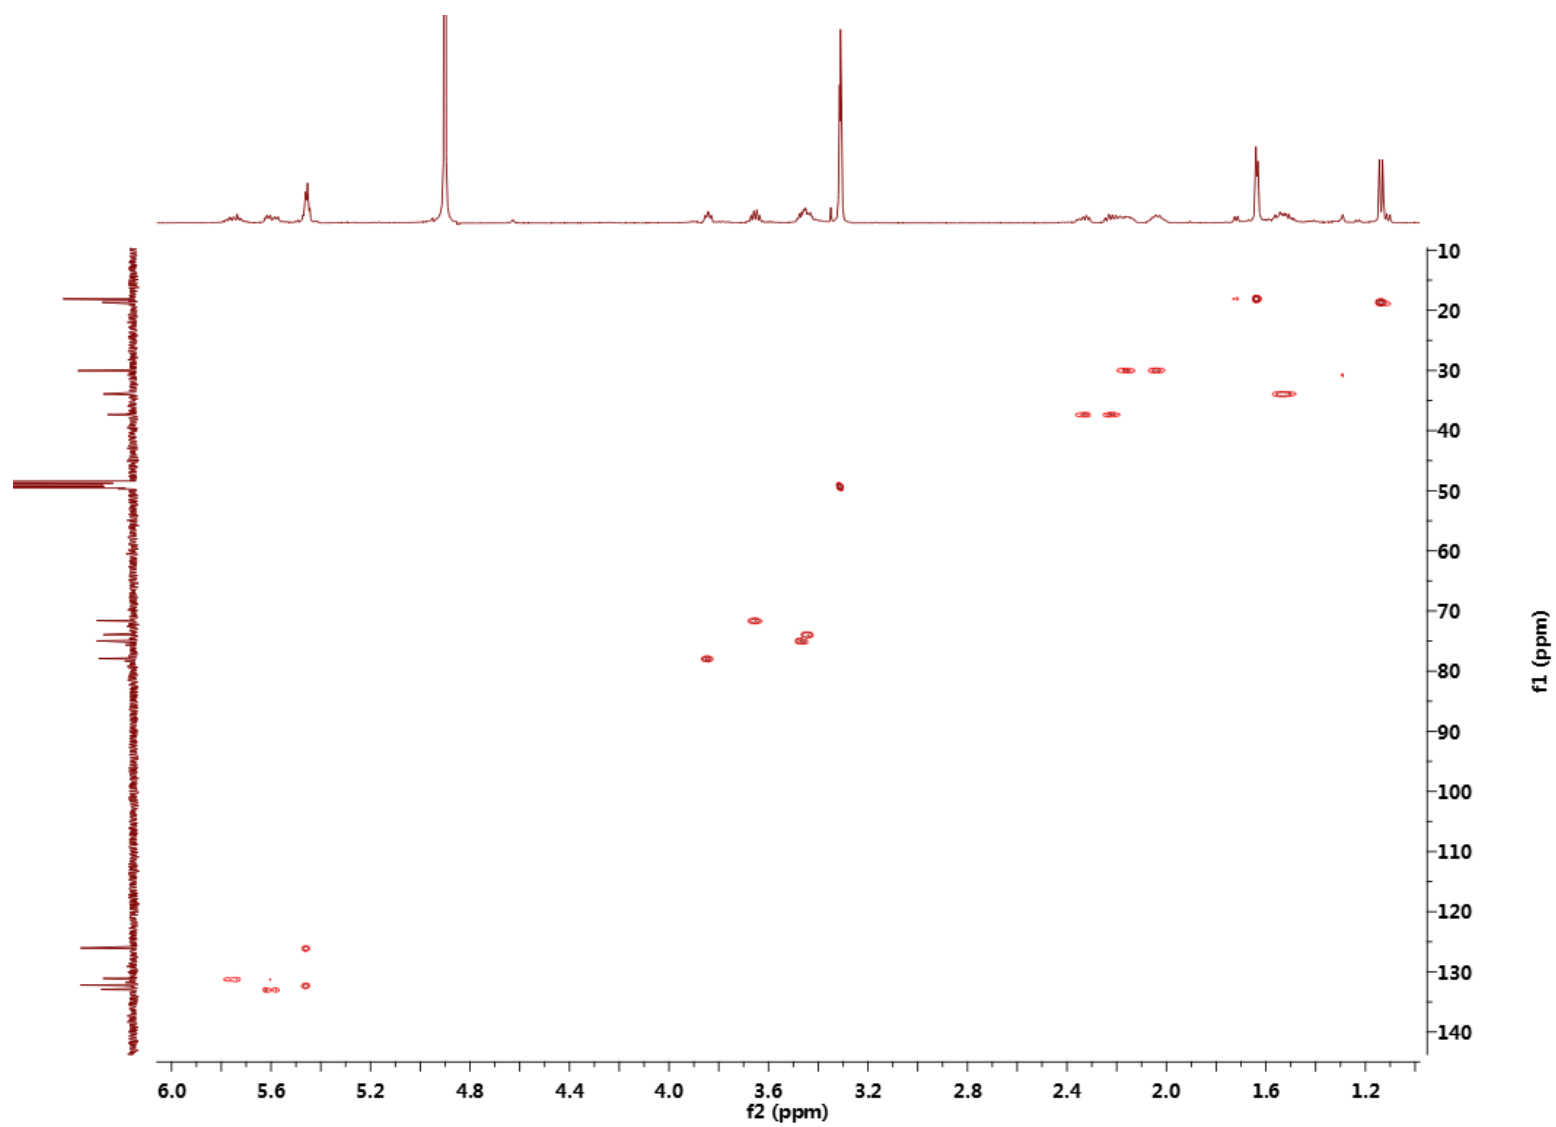

**Figure S24.** HSQC spectrum of compound **4** in CD<sub>3</sub>OD

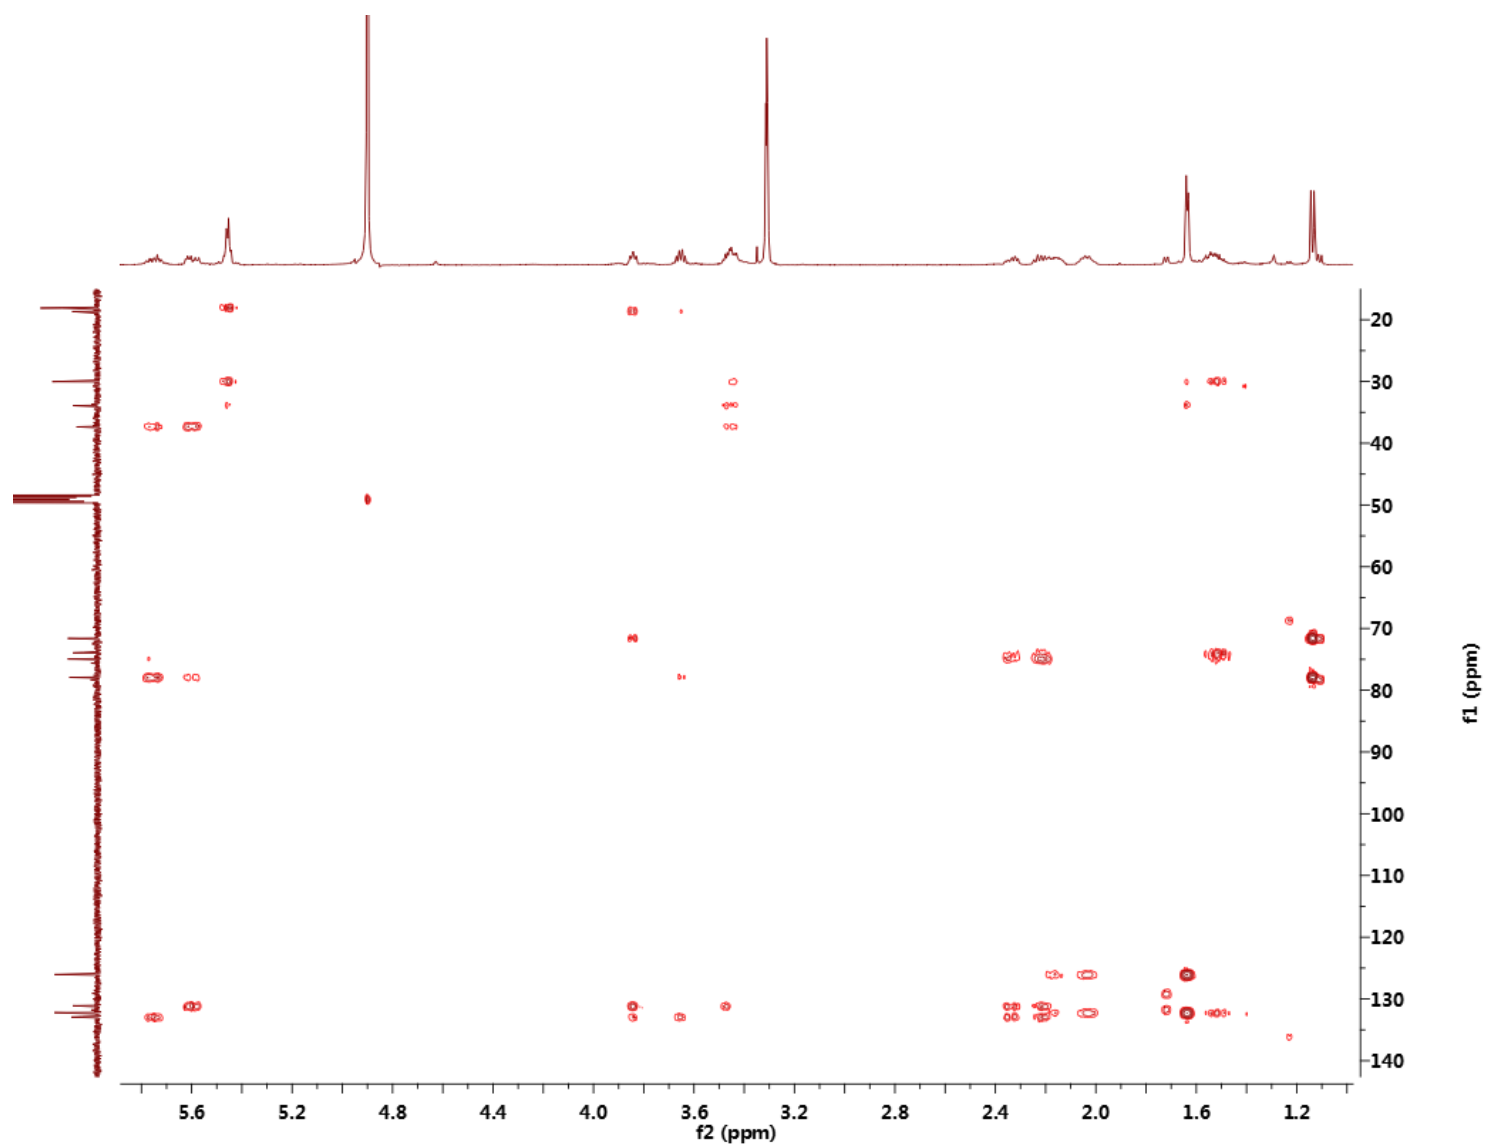

**Figure S25.** HMBC spectrum of compound **4** in CD<sub>3</sub>OD

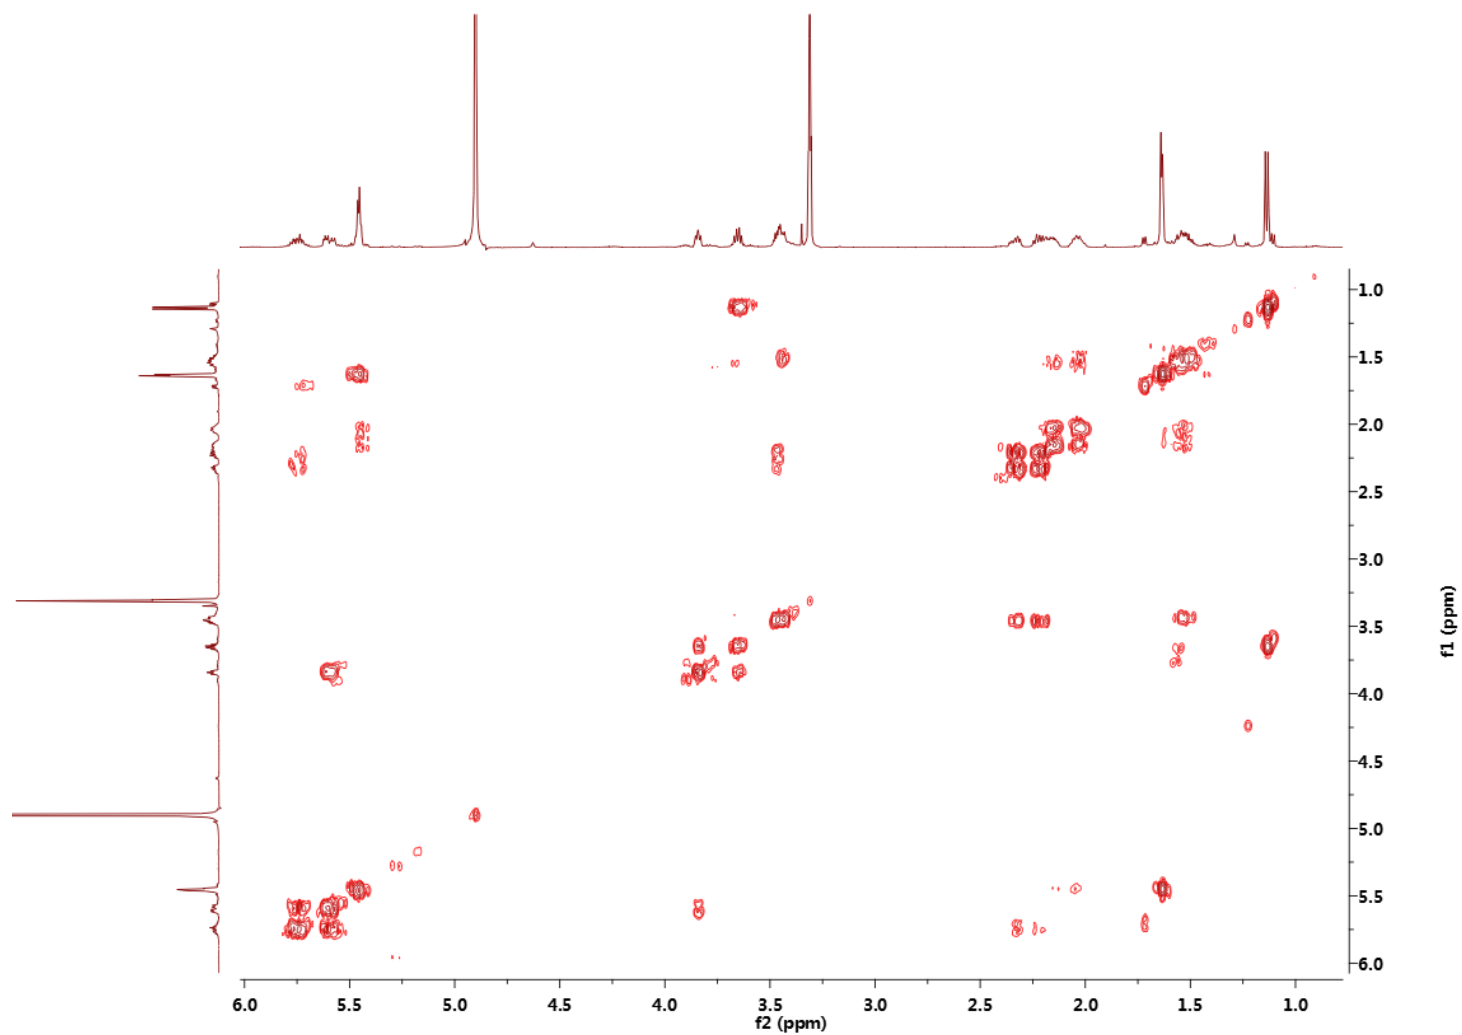

**Figure S26.** COSY spectrum of compound **4** in CD<sub>3</sub>OD

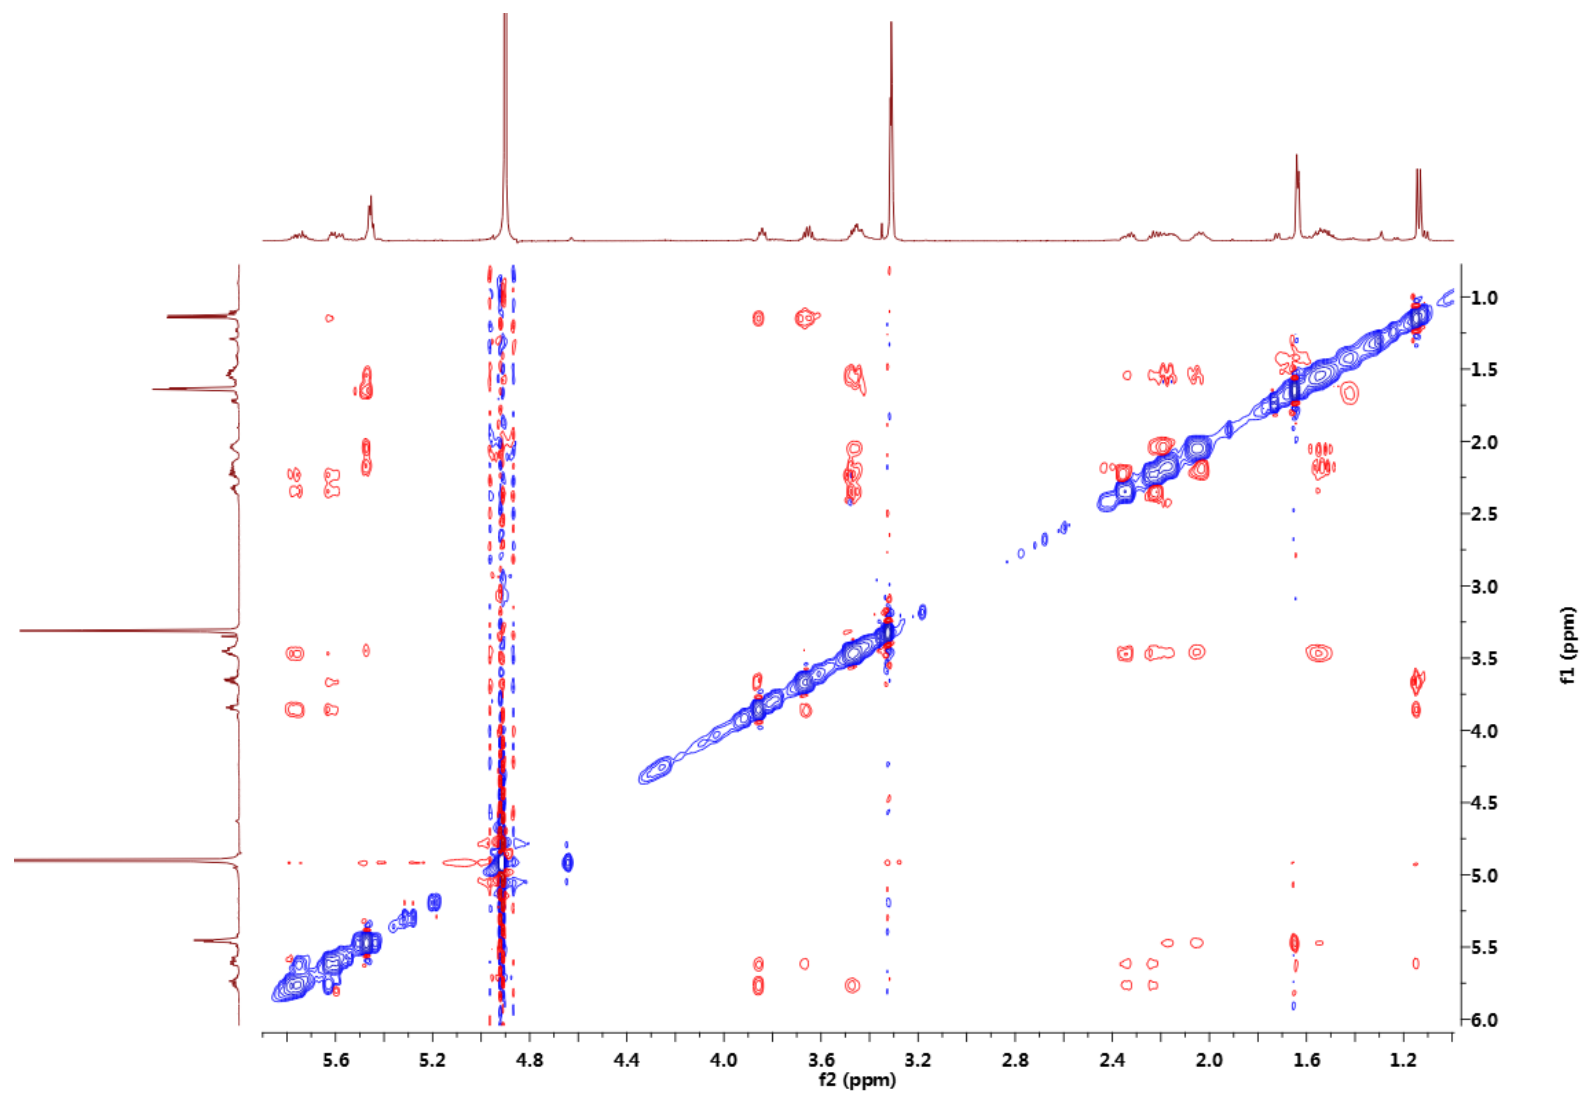

**Figure S27.** NOESY spectrum of compound **4** in CD<sub>3</sub>OD

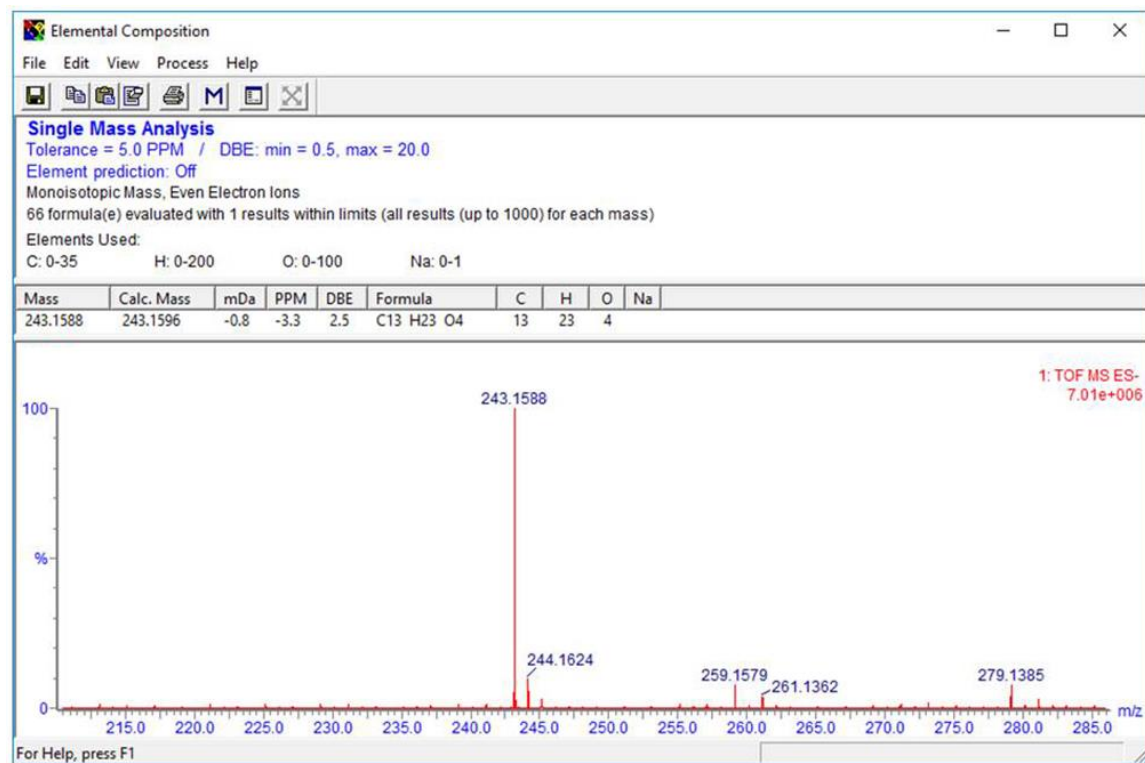

**Figure S28.** HRESIMS spectrum of compound **4**

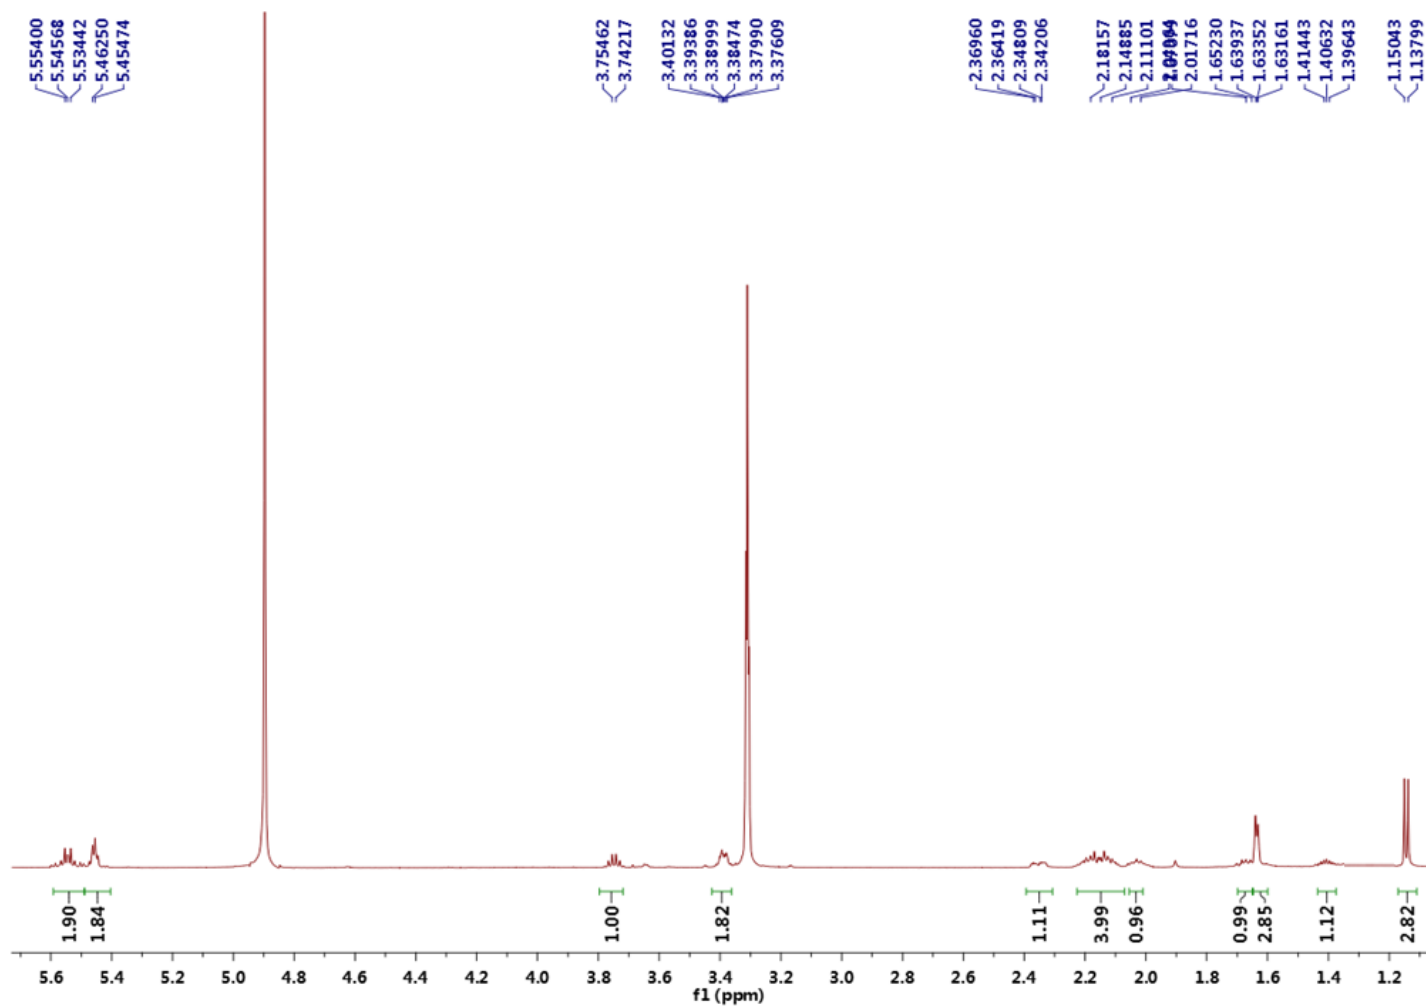

**Figure S29.** <sup>1</sup>H NMR spectrum of compound **5** in CD<sub>3</sub>OD



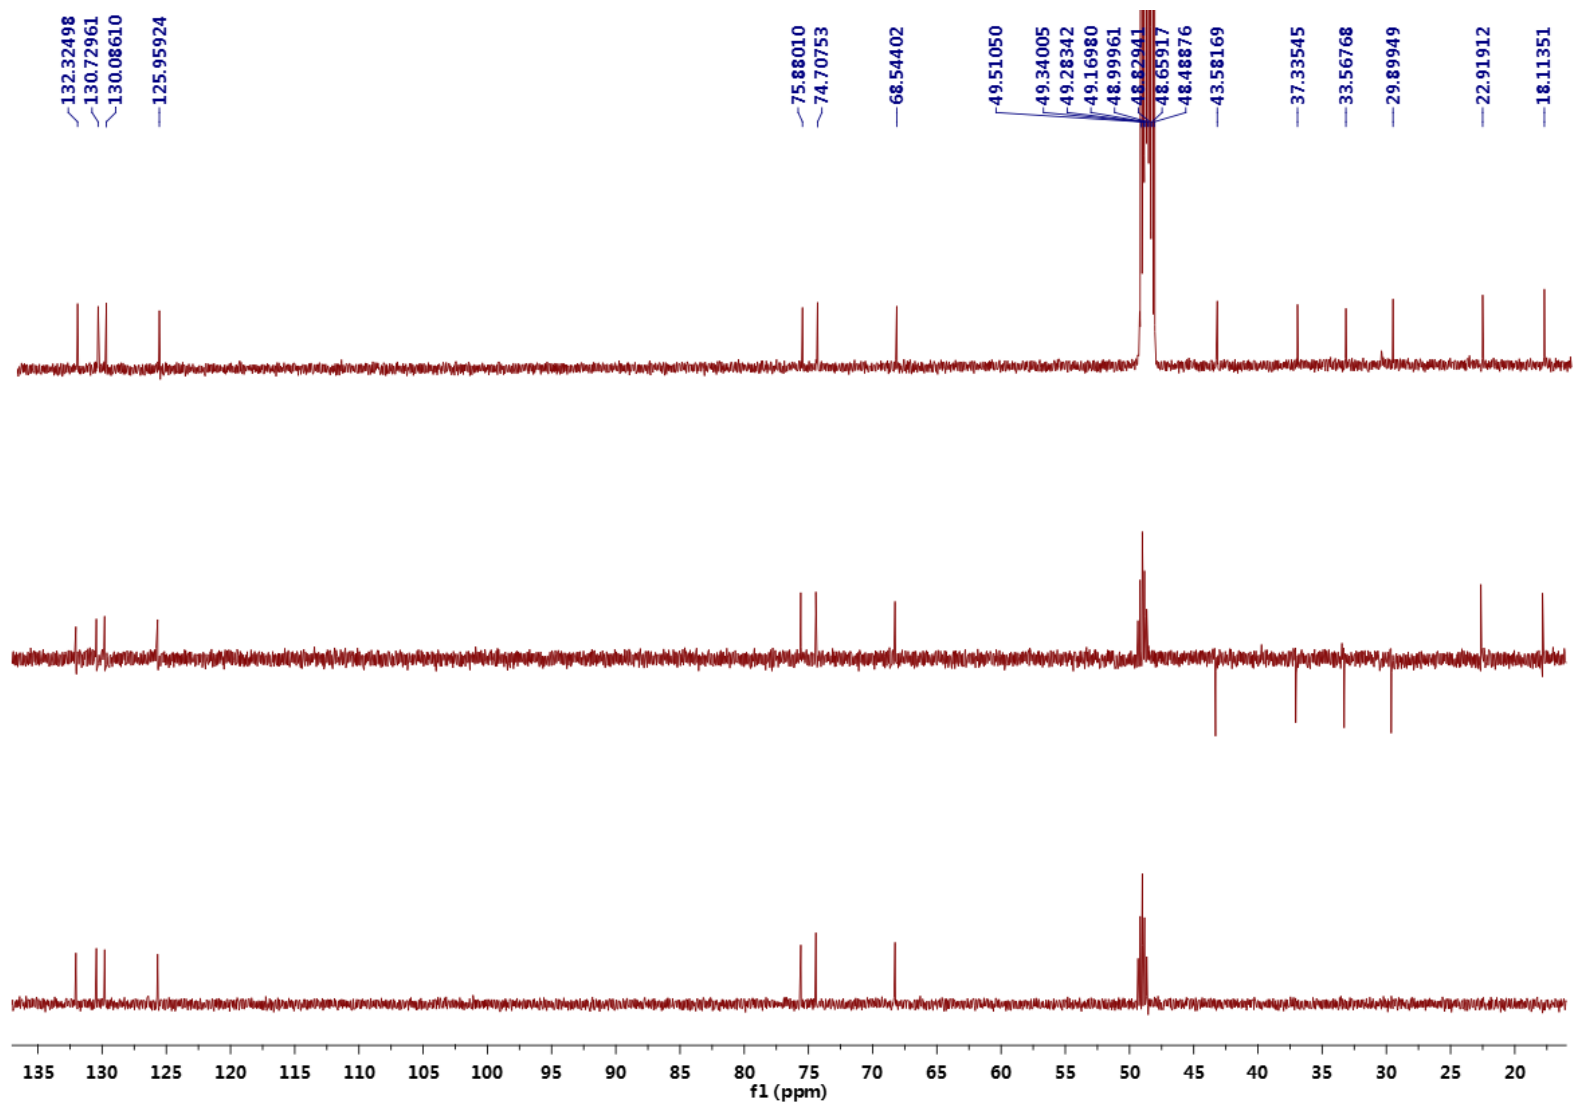

Figure S30.  $^{13}\text{C}$  NMR and DEPT spectra of compound **5** in  $\text{CD}_3\text{OD}$

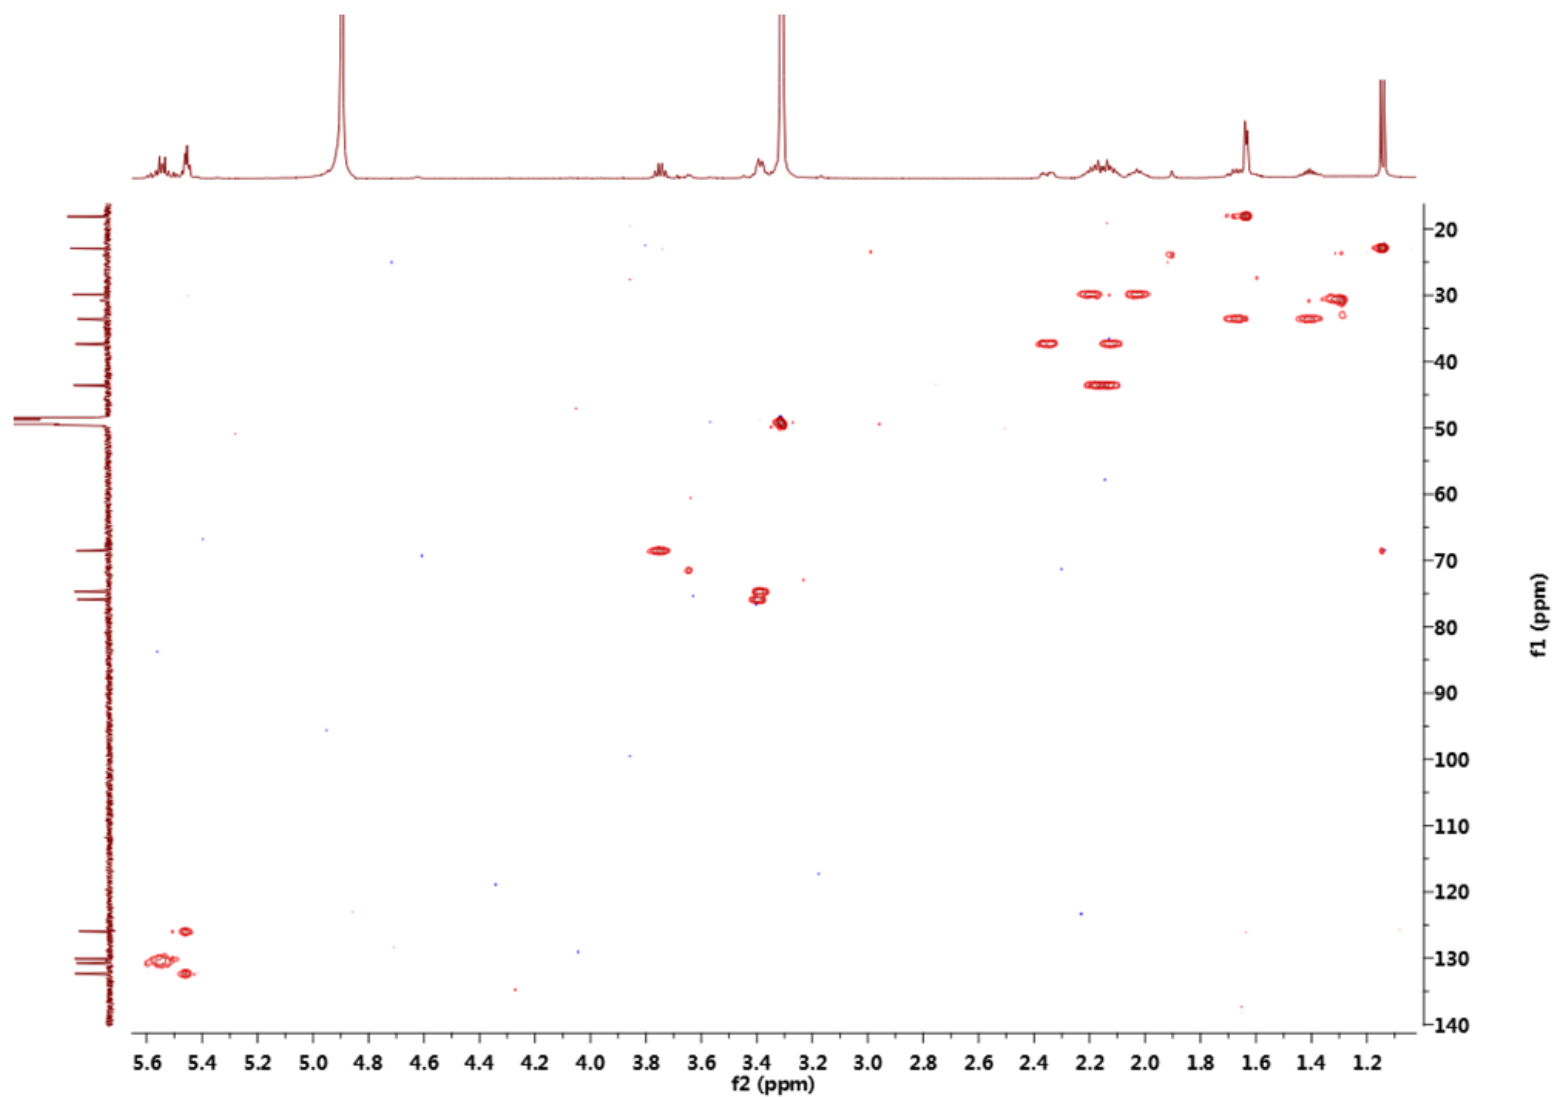

**Figure S31.** HSQC spectrum of compound **5** in CD<sub>3</sub>OD

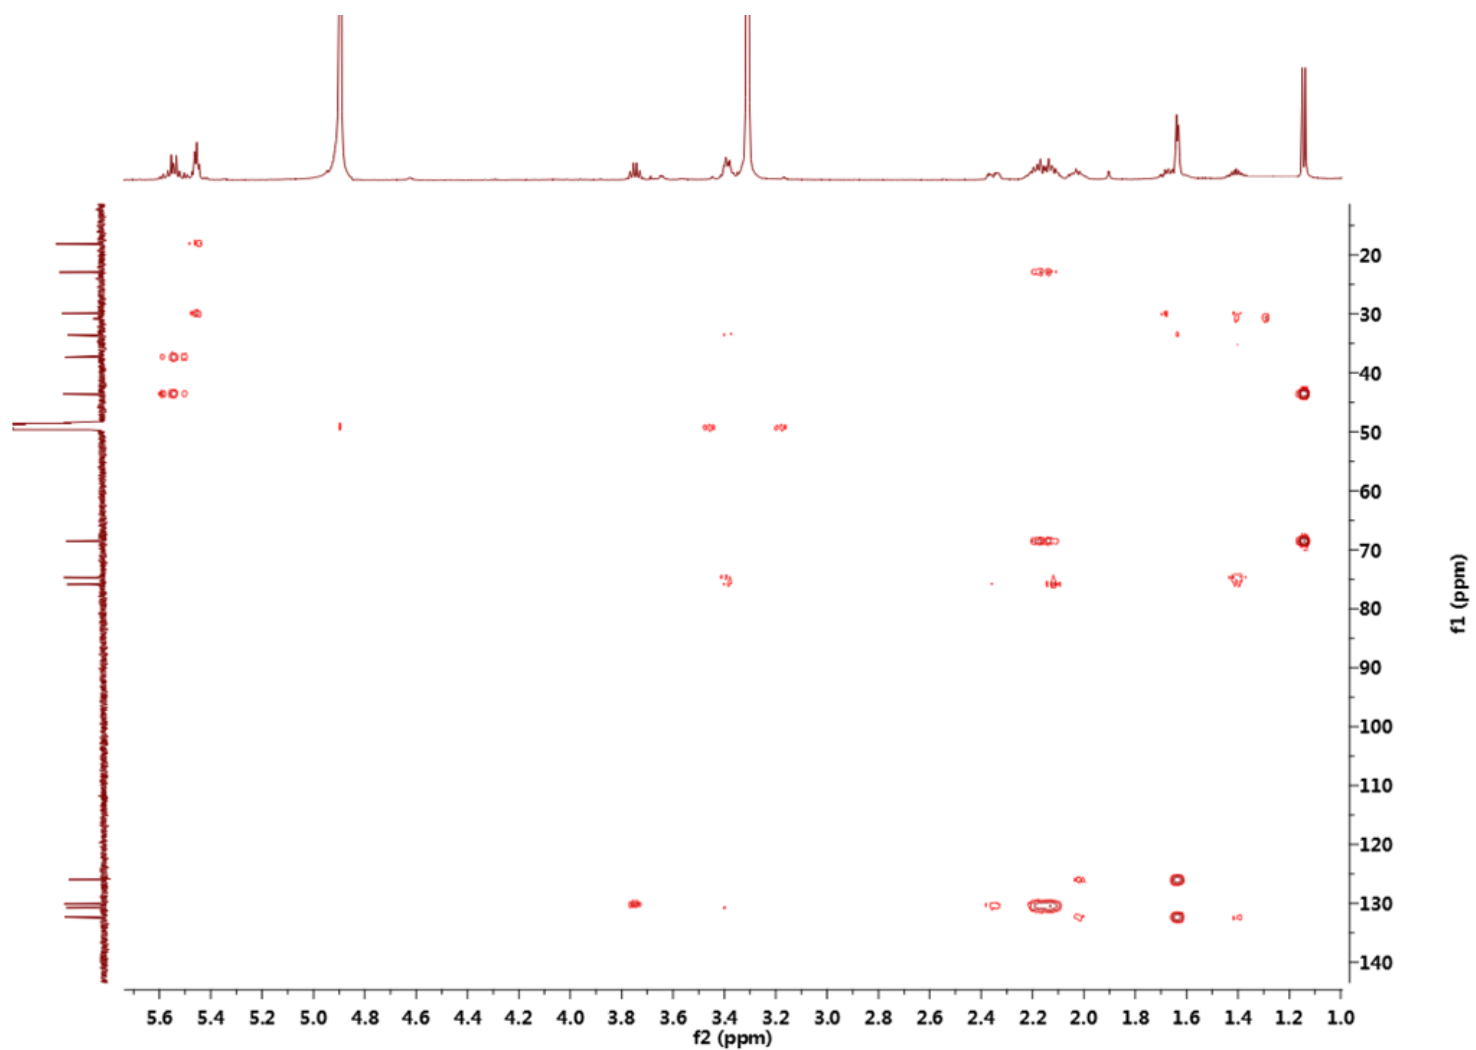

**Figure S32.** HMBC spectrum of compound **5** in  $\text{CD}_3\text{OD}$

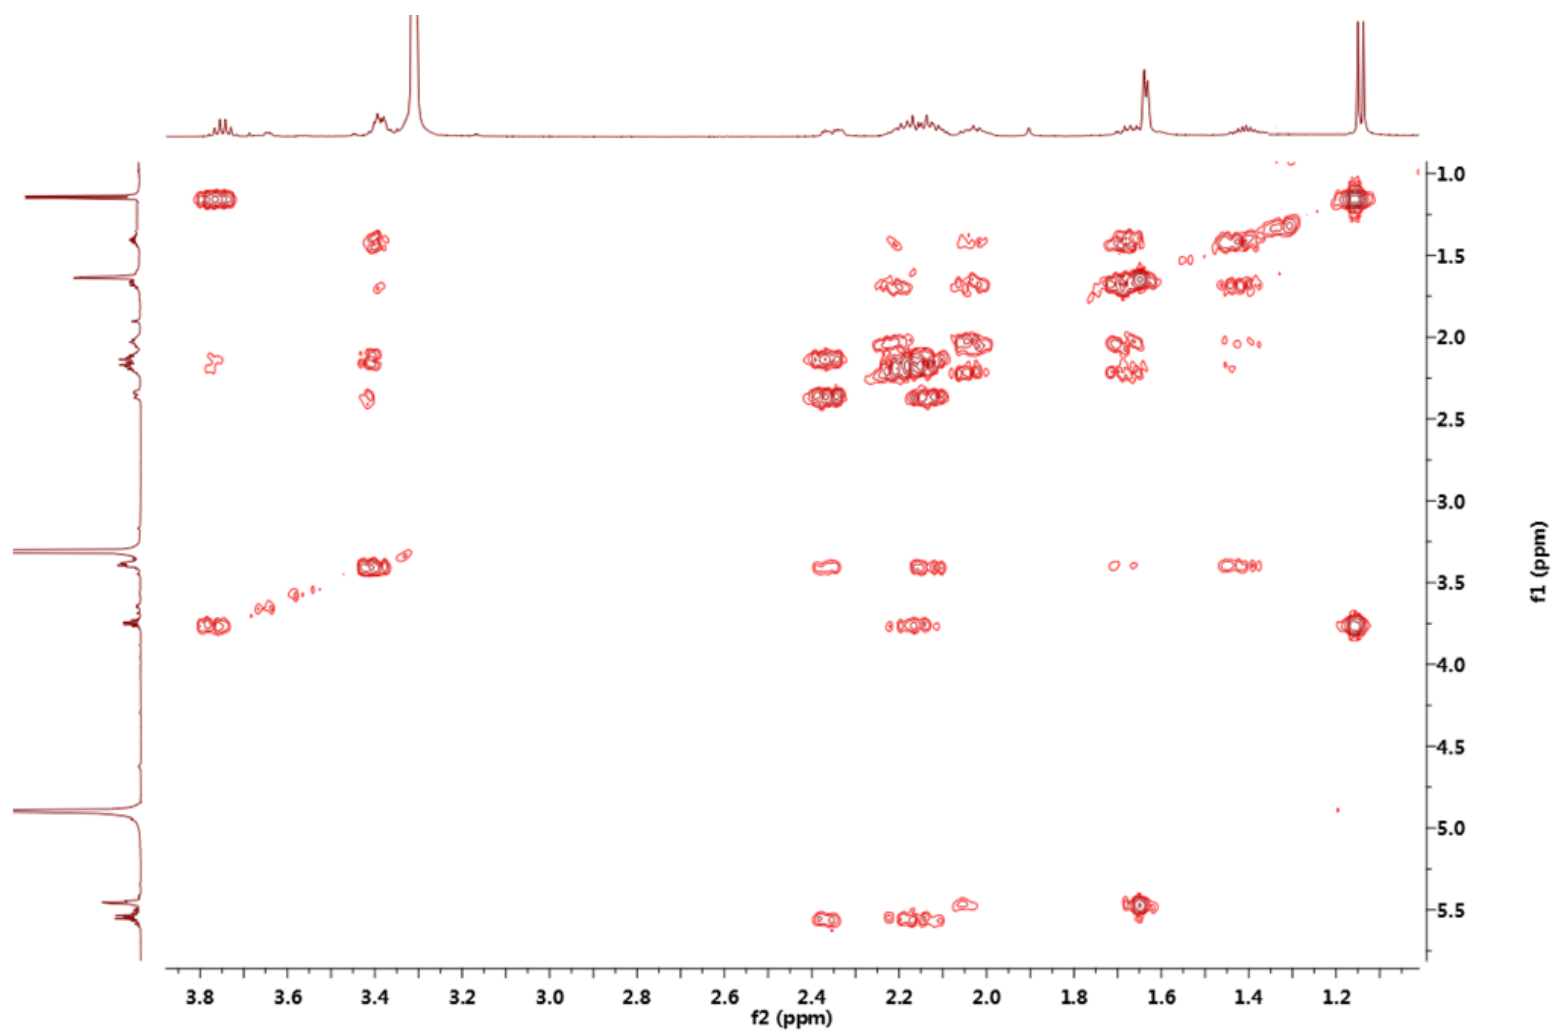

**Figure S33.** COSY spectrum of compound **5** in CD<sub>3</sub>OD

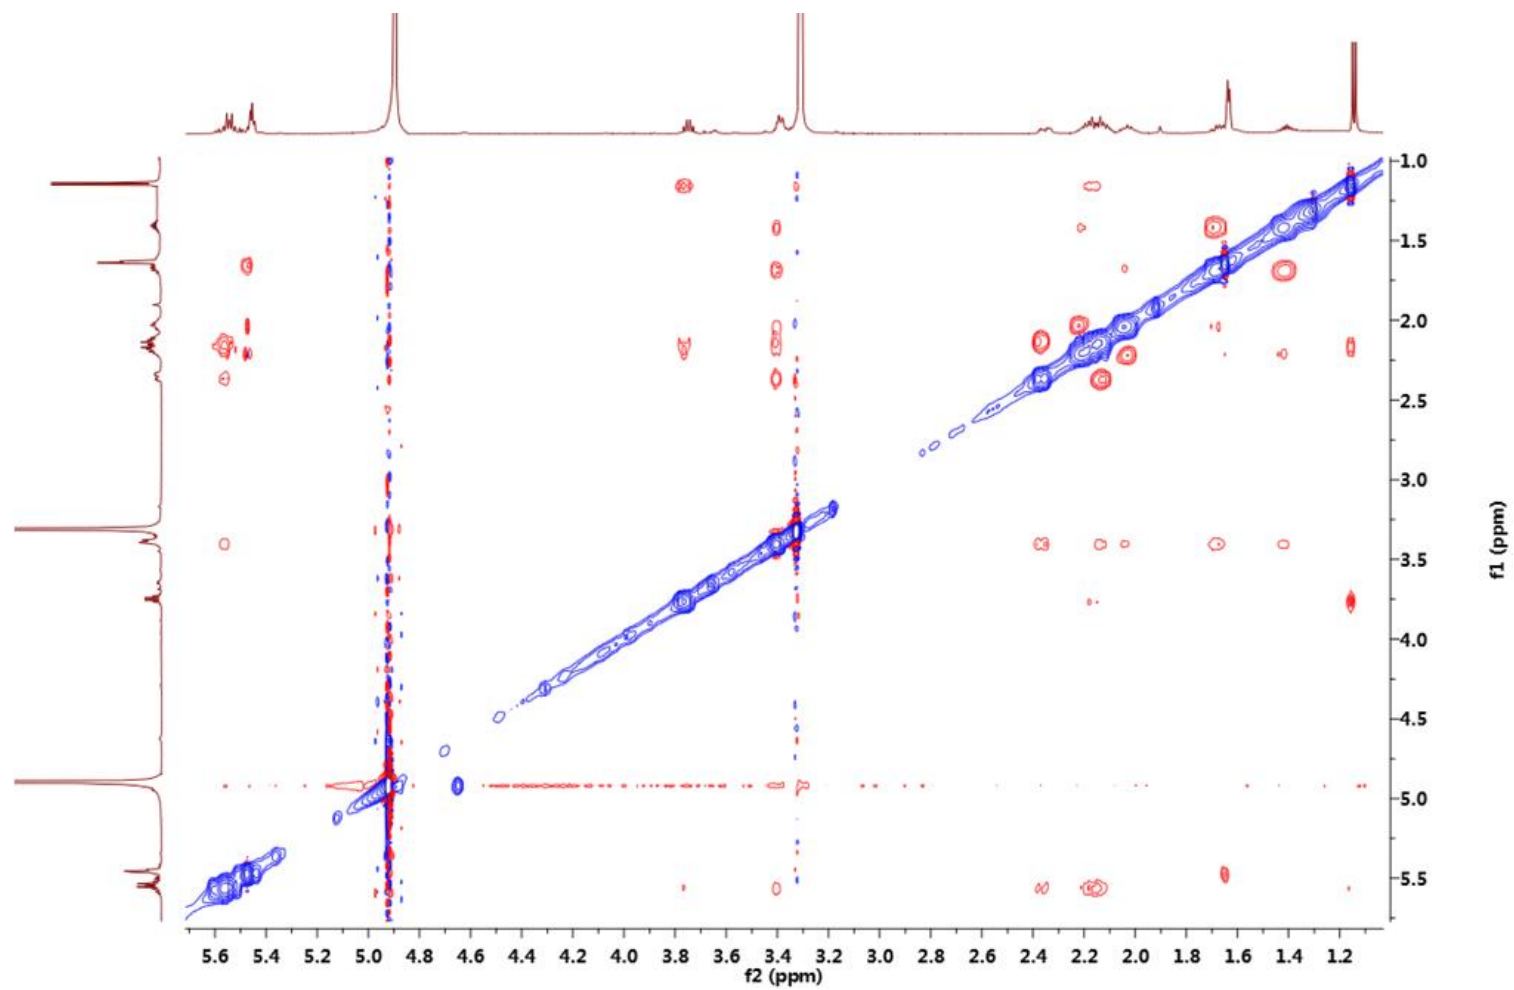

**Figure S34.** NOESY spectrum of compound **5** in CD<sub>3</sub>OD

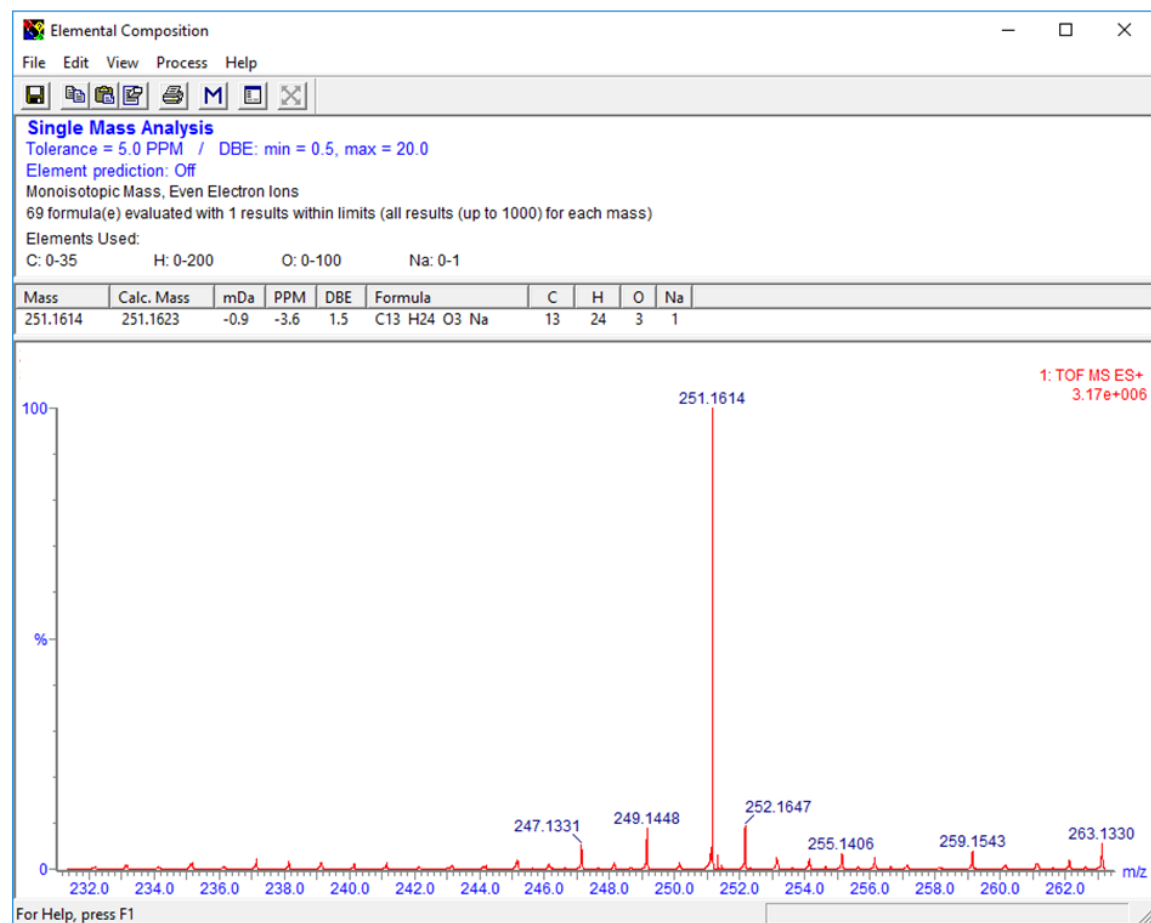

**Figure S35.** HRESIMS spectrum of compound **5**

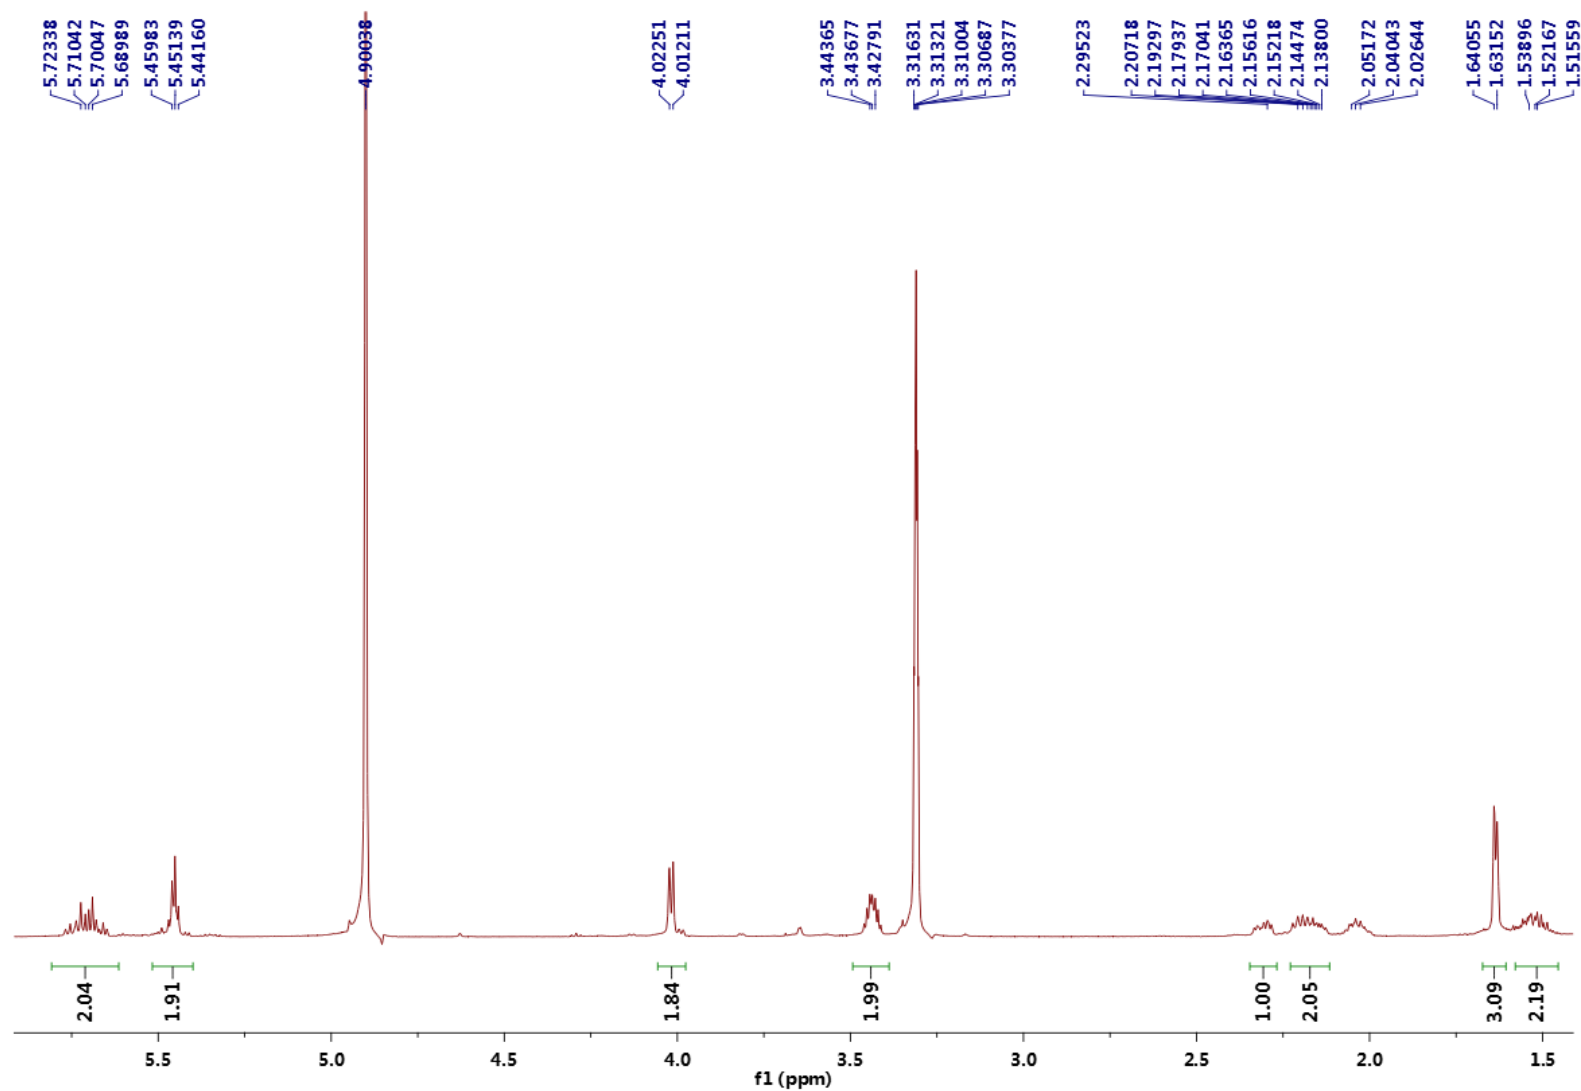

**Figure S36.**  $^1\text{H}$  NMR spectrum of compound **6** in  $\text{CD}_3\text{OD}$

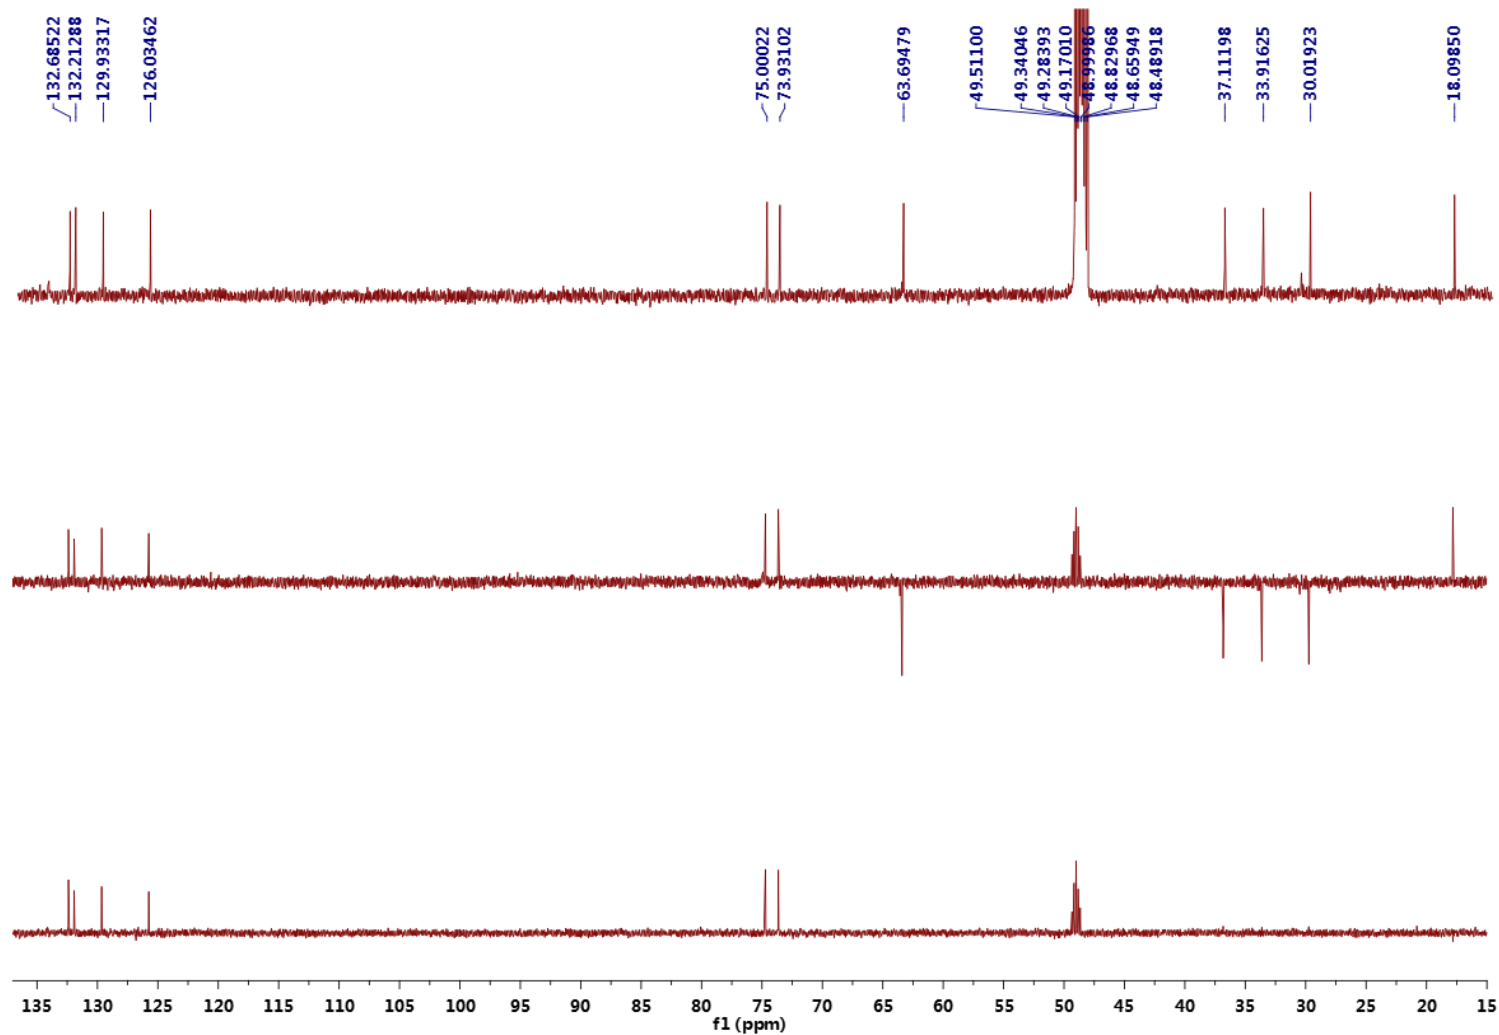

**Figure S37.**  $^{13}\text{C}$  NMR and DEPT spectra of compound **6** in  $\text{CD}_3\text{OD}$



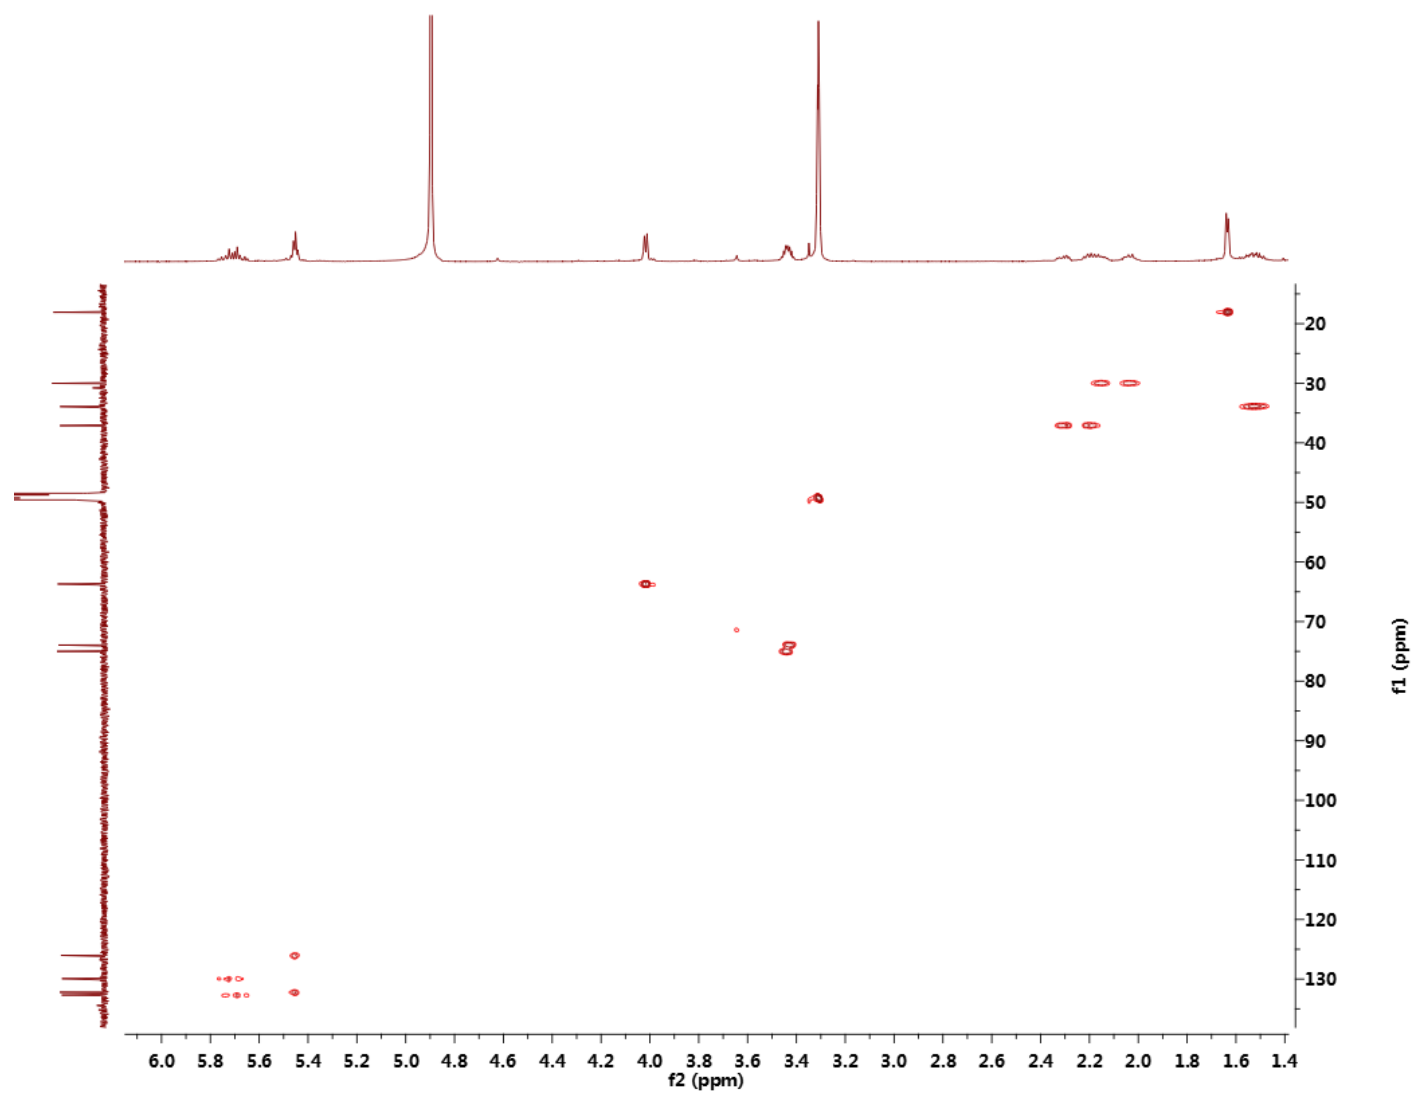

**Figure S38.** HSQC spectrum of compound **6** in CD<sub>3</sub>OD

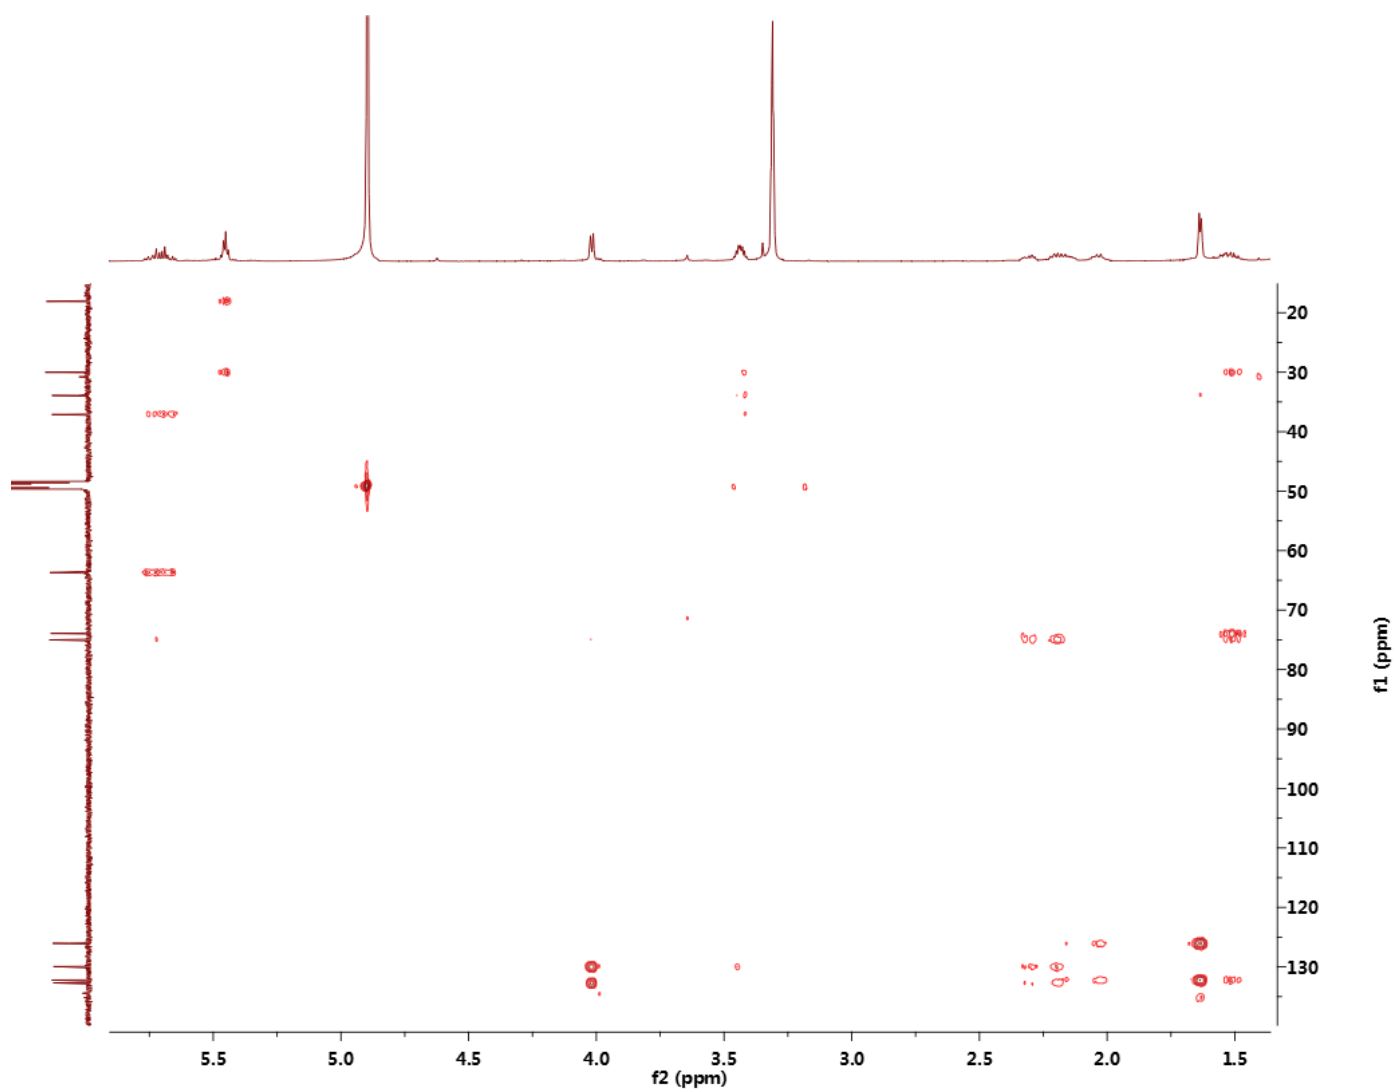

**Figure S39.** HMBC spectrum of compound **6** in CD<sub>3</sub>OD

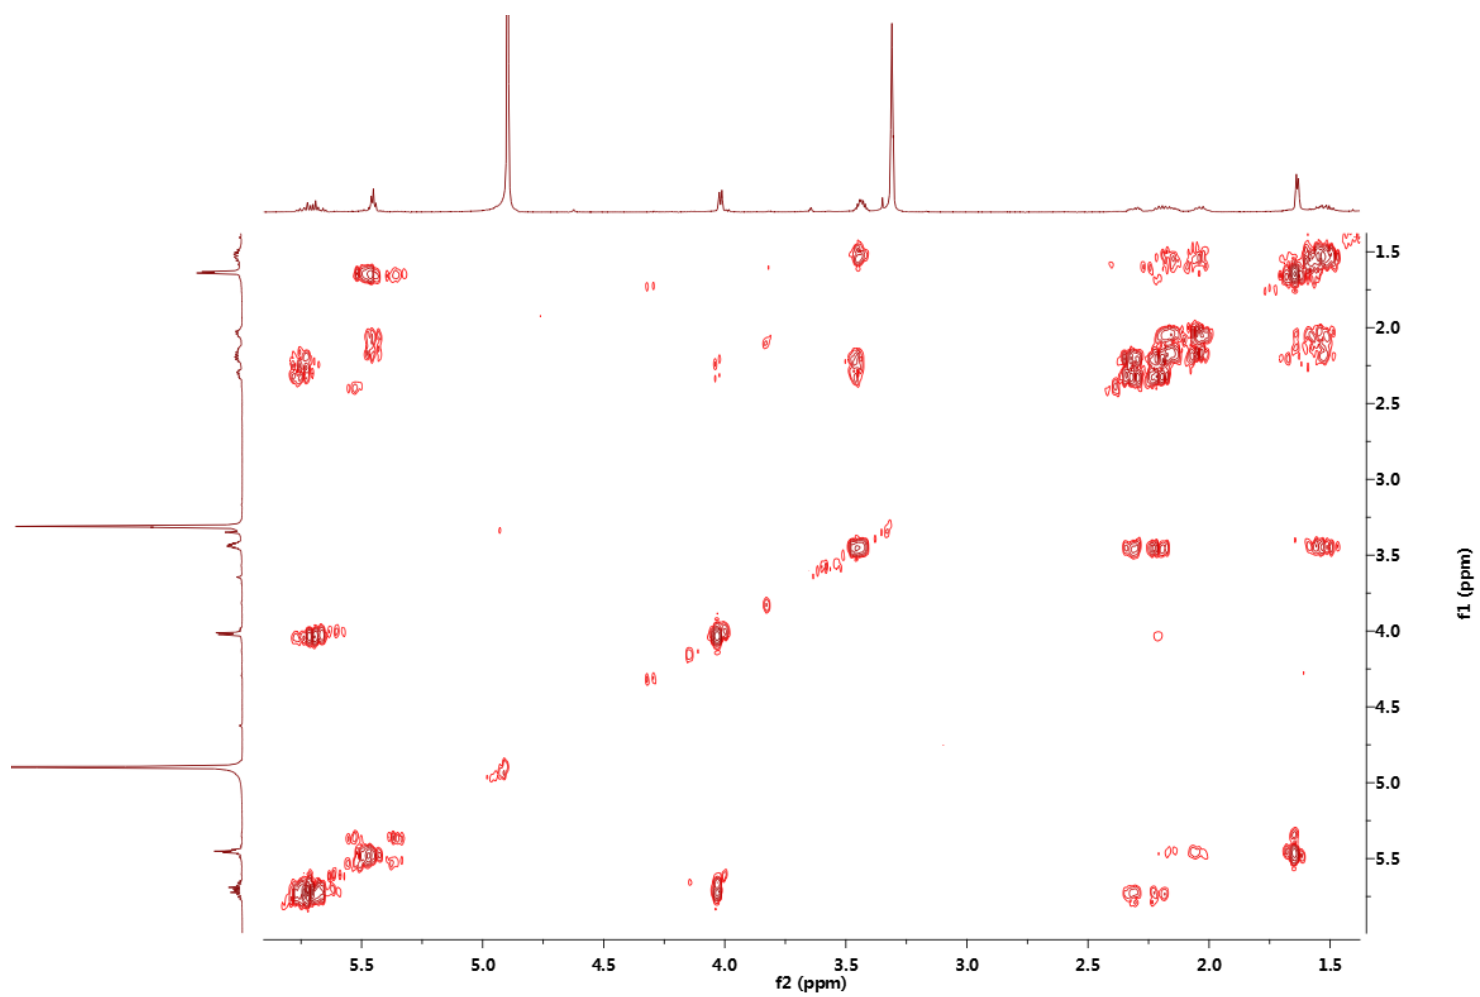

**Figure S40.** COSY spectrum of compound **6** in CD<sub>3</sub>OD

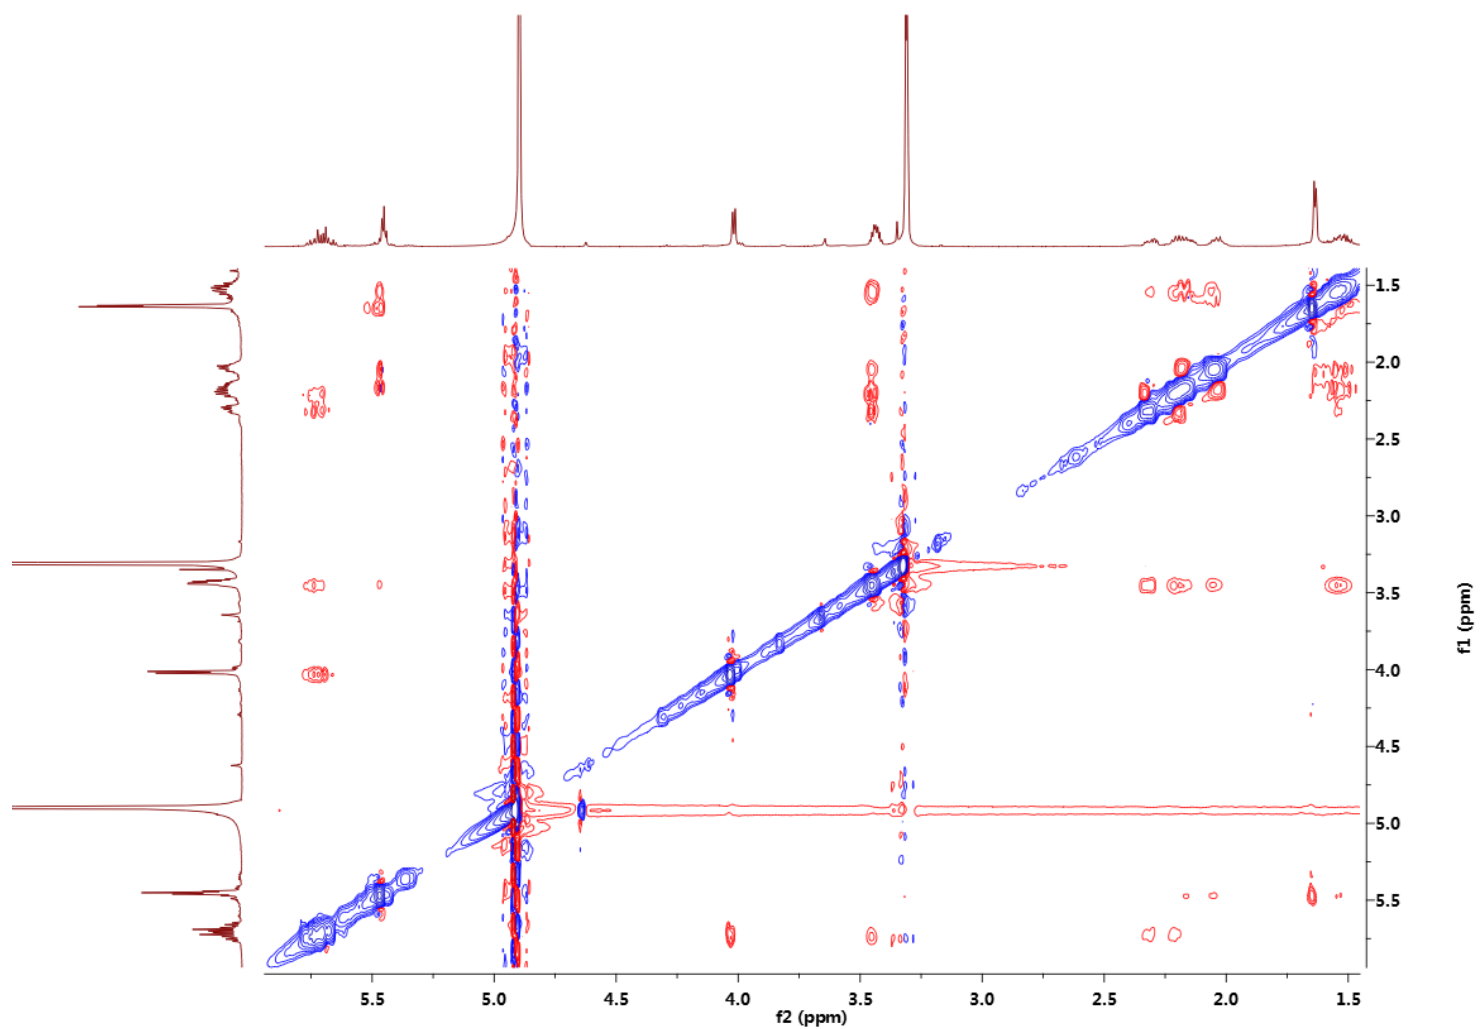

**Figure S41.** NOESY spectrum of compound **6** in CD<sub>3</sub>OD

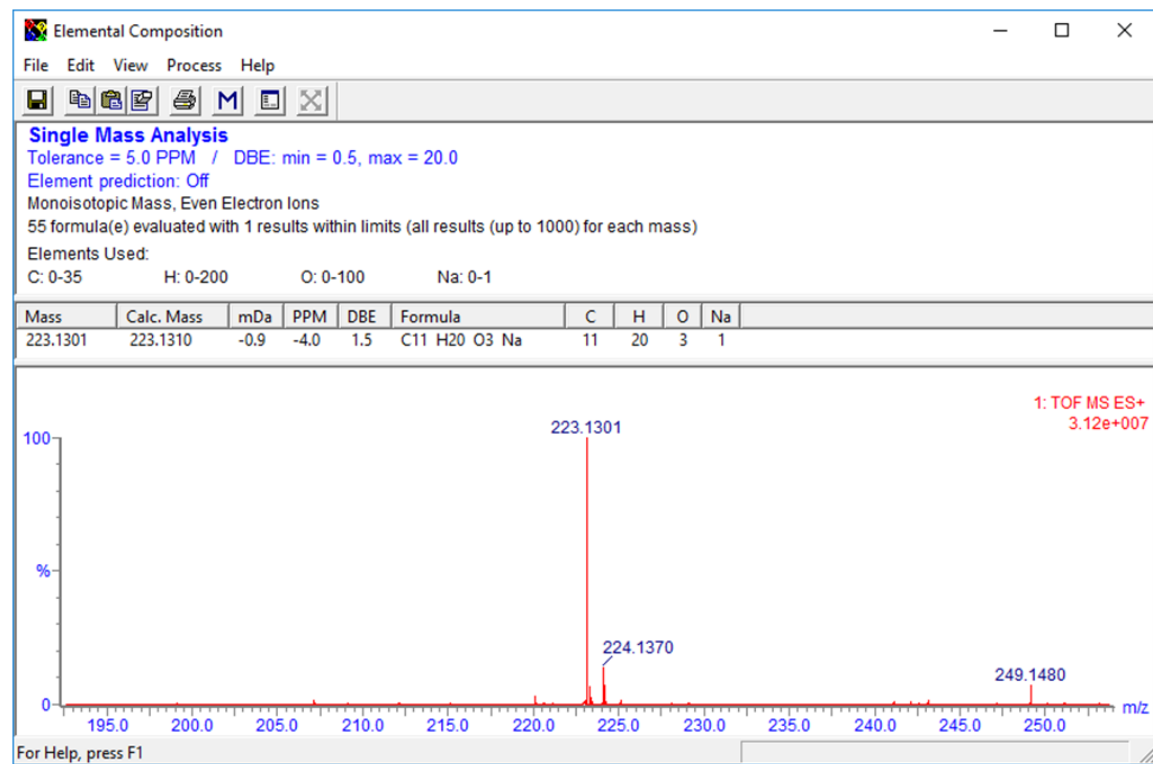

**Figure S42.** HRESIMS spectrum of compound **6**
